# Supplementary material for: Palladium-catalyzed reaction of 2-alkynylhalobenzene with 2-alkynylbenzamide: an efficient approach to indeno[1,2-c]azepin-3(2H)-ones
Source: Royal Society of Chemistry journal article supplement (doi:10.1039/c1cc14480d), 2011-01-01

# **Palladium-Catalyzed Reaction of 2-Alkynylhalobenzene with 2-Alkynylbenzamide: An Efficient Approach to Indeno[1,2-*c*]azepin-3(2*H*)-ones**

**Yong Luo<sup>†</sup> and Jie Wu<sup>\*,†,‡</sup>**

<sup>†</sup> *Department of Chemistry, Fudan University, 220 Handan Road, Shanghai 200433, China* <sup>‡</sup> *State Key Laboratory of Organometallic Chemistry, Shanghai Institute of Organic Chemistry, Chinese Academy of Sciences, 354 Fenglin Road, Shanghai 200032, China*

jie\_wu@fudan.edu.cn

## **Supporting Information**

1. General experimental methods (S2).
2. General experimental procedure and characterization data (S2-S9).
3. <sup>1</sup>H and <sup>13</sup>C NMR spectra of compound **3** (S10-S51).
4. X-ray ORTEP illustration of compound **3a** (S52)

## General experimental methods:

All reactions were performed in reaction tubes under nitrogen atmosphere. Flash column chromatography was performed using silica gel (60-Å pore size, 32–63 µm, standard grade). Analytical thin-layer chromatography was performed using glass plates pre-coated with 0.25 mm 230–400 mesh silica gel impregnated with a fluorescent indicator (254 nm). Thin layer chromatography plates were visualized by exposure to ultraviolet light. Organic solutions were concentrated on rotary evaporators at ~20 Torr (house vacuum) at 25–35°C. Commercial reagents and solvents were used as received. Nuclear magnetic resonance (NMR) spectra are recorded in parts per million from internal tetramethylsilane on the  $\delta$  scale.

General procedure for the synthesis of indeno[1,2-*c*]azepin-3(2*H*)-ones via a Pd-catalyzed reaction of 2-alkynylbromobenzene **1** with 2-alkynylbenzamide **2**.

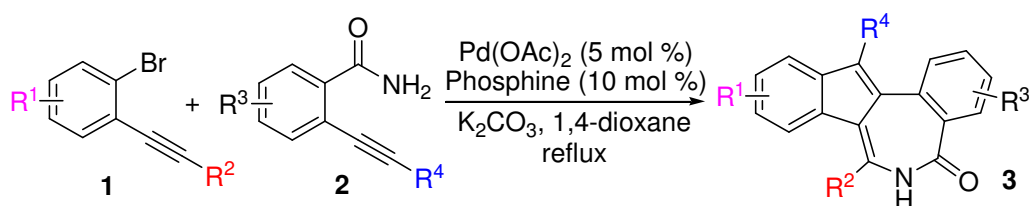

2-Alkynylhalobenzene (0.24 mmol) was added to a mixture of Pd(OAc)<sub>2</sub> (0.01 mmol, 5 mol %), PCy<sub>3</sub> or PPh<sub>3</sub> (0.02 mmol, 10 mol %), K<sub>2</sub>CO<sub>3</sub> (0.4 mmol), and 2-alkynylbenzamide (0.20 mmol) in 1,4-dioxane (2.0 mL). The reaction was stirred under reflux conditions. After completion of the reaction as indicated by TLC (usually 3-6 hours), the reaction was cooled and the mixture was purified immediately by flash chromatography on silica gel to give products **3**.

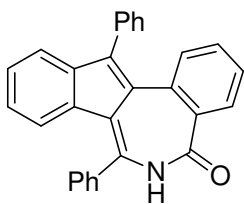

7,12-Diphenylbenzo[*c*]indeno[2,1-*e*]azepin-5(6*H*)-one **3a**.  $^1\text{H}$  NMR (400 MHz,  $\text{CDCl}_3$ ):  $\delta$  8.21 (d,  $J = 8.0$  Hz, 1H), 7.94 (br, 1H), 7.63-7.59 (m, 5H), 7.47-7.33 (m, 7H), 7.27 (t,  $J = 7.8$  Hz, 1H), 7.19-7.14 (m, 2H), 6.89 (t,  $J = 8.0$  Hz, 1H), 6.08 (d,  $J = 8.0$  Hz, 1H).  $^{13}\text{C}$  NMR (100 MHz)  $\delta$  168.0, 140.9, 140.2, 138.9, 137.6, 136.4, 135.2, 134.8, 132.7, 132.3, 131.9, 130.2, 129.8, 129.7, 129.0, 128.5, 127.6, 127.1, 125.9, 124.8, 122.2, 121.4, 120.1. HRMS (ESI) calculated for  $\text{C}_{29}\text{H}_{19}\text{NO}$  [ $\text{M}+\text{Na}$ ] $^+$  requires 420.1364, found 420.1369.

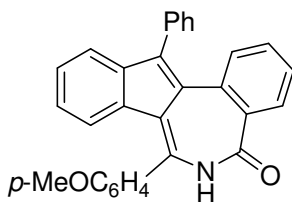

7-(4-Methoxyphenyl)-12-phenylbenzo[*c*]indeno[2,1-*e*]azepin-5(6*H*)-one **3b**.  $^1\text{H}$  NMR (400 MHz,  $\text{CDCl}_3$ ):  $\delta$  8.22 (d,  $J = 7.6$  Hz, 1H), 7.88(br, 1H), 7.51-7.49 (m, 2H), 7.46-7.35 (m, 7H), 7.9-7.25 (m, 1H), 7.20-7.16 (m, 2H), 7.12-7.09 (m, 2H), 6.93 (t,  $J = 7.6$  Hz, 1H), 6.23 (d,  $J = 8.0$  Hz, 1H), 3.94 (s, 3H).  $^{13}\text{C}$  NMR (100 MHz)  $\delta$  168.0, 160.9, 147.3, 140.8, 139.9, 139.1, 136.5, 135.4, 134.8, 132.7, 132.2, 131.8, 130.0, 129.9, 129.8, 129.7, 129.0, 127.6, 127.1, 125.8, 124.9, 122.3, 121.4, 120.1, 114.9, 55.5. HRMS (ESI) calculated for  $\text{C}_{30}\text{H}_{21}\text{NO}_2$  [ $\text{M}+\text{H}$ ] $^+$  requires 428.1651, found 428.1648.

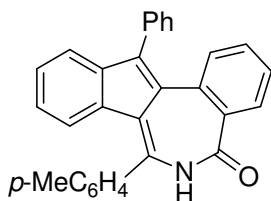

12-Phenyl-7-(*p*-tolyl)benzo[*c*]indeno[2,1-*e*]azepin-5(6*H*)-one **3c**.  $^1\text{H}$  NMR (400 MHz,  $\text{CDCl}_3$ ):  $\delta$  8.24 (d,  $J = 7.2$  Hz, 1H), 7.77(br, 1H), 7.47-7.27 (m, 11H), 7.28 (t,  $J = 7.2$  Hz, 1H), 7.20-7.16 (m, 2H), 6.92 (t,  $J = 7.6$  Hz, 1H), 6.19 (d,  $J = 8.0$  Hz, 1H), 2.52 (s, 3H).  $^{13}\text{C}$  NMR (100 MHz)  $\delta$  168.0, 147.3, 140.9, 140.4, 140.0, 139.2, 136.5, 135.3, 134.9,

134.7, 132.8, 132.3, 131.9, 130.4, 129.9, 129.0, 128.4, 127.6, 127.1, 125.8, 124.8, 121.4, 120.1, 21.6. HRMS (ESI) calculated for  $C_{30}H_{21}NO$   $[M+H]^+$  requires 412.1701, found 412.1703.

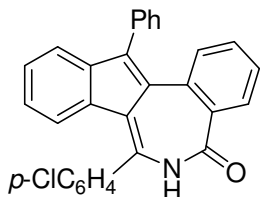

7-(4-Chlorophenyl)-12-phenylbenzo[c]indeno[2,1-*e*]azepin-5(6*H*)-one **3d**.  $^1H$  NMR (400 MHz,  $CDCl_3$ ):  $\delta$  8.22 (d,  $J$  = 8.0 Hz, 1H), 7.78(br, 1H), 7.61-7.51 (m, 4H), 7.45-7.40 (m, 6H), 7.35-7.27 (m, 2H), 7.23-7.17 (m, 2H), 6.95 (t,  $J$  = 7.2 Hz, 1H), 6.16 (d,  $J$  = 8.0 Hz, 1H).  $^{13}C$  NMR (100 MHz)  $\delta$  168.0, 141.1, 140.6, 137.4, 136.4, 136.2, 135.9, 135.0, 134.7, 132.7, 132.3, 132.0, 131.8, 130.2, 130.1, 130.0, 129.8, 129.7, 129.1, 127.8, 127.2, 126.2, 125.0, 121.3, 120.3. HRMS (ESI) calculated for  $C_{29}H_{18}ClNO$   $[M+Na]^+$  requires 454.0975, found 454.0983.

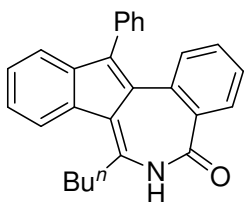

7-Butyl-12-phenylbenzo[c]indeno[2,1-*e*]azepin-5(6*H*)-one **3e**.  $^1H$  NMR (400 MHz,  $CDCl_3$ ):  $\delta$  8.40 (br, 1H), 8.25-8.23 (m, 1H), 7.72-7.70 (m, 1H), 7.53-7.51 (m, 1H), 7.46-7.40 (m, 4H), 7.37-7.31 (m, 3H), 7.27-7.24 (m, 2H), 7.14-7.10 (m, 1H), 3.02 (t,  $J$  = 8.4 Hz, 2H), 1.94-1.90 (m, 2H), 1.66-1.60 (m, 2H), 1.07-1.03 (t,  $J$  = 7.2 Hz, 3H).  $^{13}C$  NMR (100 MHz)  $\delta$  169.0, 147.4, 141.2, 141.0, 136.4, 135.2, 134.9, 132.9, 132.6, 131.9, 131.8, 130.0, 129.4, 128.9, 127.5, 126.9, 125.7, 125.2, 121.7, 121.5, 120.6, 35.9, 30.7, 22.8, 13.9. HRMS (ESI) calculated for  $C_{27}H_{23}NO$   $[M+H]^+$  requires 378.1858, found 378.1865.

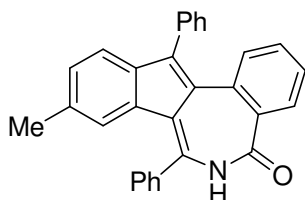

9-Methyl-7,12-diphenylbenzo[*c*]indeno[2,1-*e*]azepin-5(6*H*)-one **3f**.  $^1\text{H}$  NMR (400 MHz,  $\text{CDCl}_3$ ):  $\delta$  8.25 (d,  $J$  = 8.0 Hz, 1H), 7.70(br, 1H), 7.64-7.55 (m, 5H), 7.47-7.41 (m, 4H), 7.39-7.32 (m, 2H), 7.29-7.27 (m, 2H), 7.17-7.15 (m, 1H), 7.00 (d,  $J$  = 8.0 Hz, 1H), 5.83 (s, 1H), 2.08 (s, 3H).  $^{13}\text{C}$  NMR (100 MHz)  $\delta$  168.0, 138.7, 138.4, 137.7, 136.6, 134.5, 132.7, 132.3, 131.9, 130.1, 129.8, 129.6, 129.0, 128.6, 127.6, 126.9, 126.8, 122.2, 119.8, 21.8. HRMS (ESI) calculated for  $\text{C}_{30}\text{H}_{21}\text{NO}$   $[\text{M}+\text{Na}]^+$  requires 434.1521, found 434.1527.

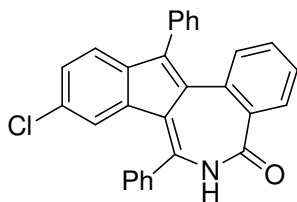

9-Chloro-7,12-diphenylbenzo[*c*]indeno[2,1-*e*]azepin-5(6*H*)-one **3g**.  $^1\text{H}$  NMR (400 MHz,  $\text{CDCl}_3$ ):  $\delta$  8.26 (d,  $J$  = 7.6 Hz, 1H), 7.75 (br, 1H), 7.68-7.62 (m, 3H), 7.58-7.56 (m, 2H), 7.45-7.43 (m, 5H), 7.35-7.29 (m, 3H), 7.20-7.12 (m, 2H), 5.95 (s, 1H).  $^{13}\text{C}$  NMR (100 MHz)  $\delta$  132.7, 132.5, 132.1, 130.6, 129.9, 129.8, 129.2, 128.4, 128.9, 127.4, 125.8, 121.6, 120.9. HRMS (ESI) calculated for  $\text{C}_{28}\text{H}_{18}\text{ClNO}$   $[\text{M}+\text{H}]^+$  requires 432.1155, found 432.1178.

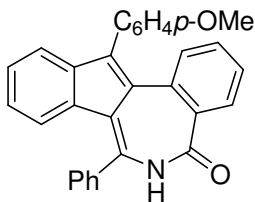

12-(4-Methoxyphenyl)-7-phenylbenzo[*c*]indeno[2,1-*e*]azepin-5(6*H*)-one **3h**.  $^1\text{H}$  NMR (400 MHz,  $\text{CDCl}_3$ ):  $\delta$  8.25(dd,  $J$  = 7.6, 1.2 Hz, 1H), 7.69 (br, 1H), 7.63-7.55 (m, 5H), 7.43-7.39 (m, 4H), 7.31-7.29 (m, 1H), 7.22-7.17 (m, 2H), 6.99-6.90 (m, 2H), 6.88 (t,  $J$  = 7.6 Hz, 1H), 6.08 (d,  $J$  = 8.0 Hz, 1H), 3.88 (s, 3H).  $^{13}\text{C}$  NMR (100 MHz)  $\delta$  168.1, 137.7, 132.6, 132.3, 131.9, 131.0, 130.2, 129.7, 128.5, 127.0, 125.9, 124.8, 121.4, 120.2, 114.5. HRMS (ESI) calculated for  $\text{C}_{30}\text{H}_{21}\text{NO}_2$   $[\text{M}+\text{Na}]^+$  requires 450.1470, found 450.1485.

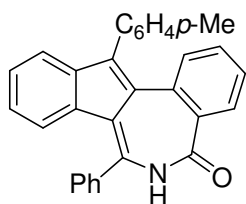

7-Phenyl-12-(*p*-tolyl)benzo[*c*]indeno[2,1-*e*]azepin-5(6*H*)-one **3i**.  $^1\text{H}$  NMR (400 MHz,  $\text{CDCl}_3$ ):  $\delta$  8.25 (d,  $J = 7.6$  Hz, 1H), 7.72(br, 1H), 7.63-7.55 (m, 5H), 7.42-7.34 (m, 4H), 7.31-7.23 (m, 3H), 7.20-7.16 (m, 2H), 6.88 (t,  $J = 7.6$  Hz, 1H), 6.08 (d,  $J = 7.6$  Hz, 1H), 2.43 (s, 3H).  $^{13}\text{C}$  NMR (100 MHz)  $\delta$  168.0, 141.1, 140.3, 138.5, 137.6, 137.4, 135.2, 135.0, 133.3, 132.7, 132.3, 131.9, 130.2, 129.8, 129.73, 129.70, 128.5, 127.0, 125.9, 124.8, 121.3, 120.2, 21.4. HRMS (ESI) calculated for  $\text{C}_{30}\text{H}_{21}\text{NO}$   $[\text{M}+\text{H}]^+$  requires 412.1701, found 412.1715.

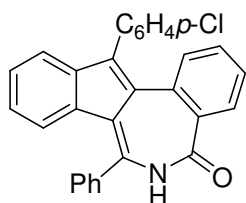

12-(4-Chlorophenyl)-7-phenylbenzo[*c*]indeno[2,1-*e*]azepin-5(6*H*)-one **3j**.  $^1\text{H}$  NMR (400 MHz,  $\text{CDCl}_3$ ):  $\delta$  8.26 (d,  $J = 7.6$  Hz, 1H), 7.78(br, 1H), 7.63-7.56 (m, 4H), 7.46-7.41 (m, 5H), 7.37-7.31 (m, 4H), 7.25-7.17 (m, 1H), 6.90 (t,  $J = 7.6$  Hz, 1H), 6.09 (d,  $J = 8.0$  Hz, 1H).  $^{13}\text{C}$  NMR (100 MHz)  $\delta$  167.9, 140.5, 139.3, 138.7, 137.5, 135.2, 134.9, 134.5, 133.6, 133.4, 132.7, 132.4, 132.1, 131.2, 130.3, 129.9, 129.8, 129.4, 128.9, 128.5, 127.4, 126.0, 125.0, 121.4, 119.9. HRMS (ESI) calculated for  $\text{C}_{29}\text{H}_{18}\text{ClNO}$   $[\text{M}+\text{H}]^+$  requires 432.1155, found 432.1138.

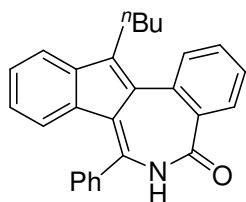

12-butyl-7-phenylbenzo[*c*]indeno[2,1-*e*]azepin-5(6*H*)-one **3k**.  $^1\text{H}$  NMR (400 MHz,  $\text{CDCl}_3$ ):  $\delta$  8.32 (d,  $J = 8.0$  Hz, 1H), 7.73-7.71(m, 1H), 7.66-7.62 (m, 2H), 7.60-7.51 (m, 5H), 7.48-7.44 (m, 2H), 7.24-7.20 (m, 1H), 6.85 (t,  $J = 7.6$  Hz, 1H), 6.02 (d,  $J = 8.0$  Hz,

1H), 2.99 (t,  $J = 8.0$  Hz, 2H), 1.84-1.80 (m, 2H), 1.54-1.48 (m, 2H), 0.99 (t,  $J = 7.2$  Hz, 3H).  $^{13}\text{C}$  NMR (100 MHz)  $\delta$  167.9, 147.3, 141.4, 140.6, 137.7, 136.8, 135.3, 135.2, 132.5, 132.46, 132.43, 132.1, 130.7, 130.0, 129.6, 128.7, 127.1, 124.4, 125.6, 121.1, 119.2, 31.5, 27.3, 23.3, 13.9. HRMS (ESI) calculated for  $\text{C}_{27}\text{H}_{23}\text{NO}$   $[\text{M}+\text{H}]^+$  requires 378.1858, found 378.1827.

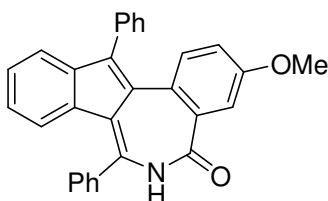

3-Methoxy-7,12-diphenylbenzo[*c*]indeno[2,1-*e*]azepin-5(6*H*)-one **3l**.  $^1\text{H}$  NMR (400 MHz,  $\text{CDCl}_3$ ):  $\delta$  7.90 (s, 1H), 7.74 (br, 1H), 7.61-7.58 (m, 5H), 7.45-7.37 (m, 6H), 7.30-7.25 (m, 1H), 7.17 (d,  $J = 7.6$  Hz, 1H), 6.87 (t,  $J = 7.6$  Hz, 1H), 6.75 (dd,  $J = 8.8, 2.4$  Hz, 1H), 6.07 (d,  $J = 7.6$  Hz, 1H), 3.85 (s, 3H).  $^{13}\text{C}$  NMR (100 MHz)  $\delta$  167.6, 158.3, 147.3, 141.2, 138.6, 138.3, 137.6, 136.6, 134.9, 134.4, 131.7, 130.8, 130.2, 129.8, 129.7, 129.0, 128.6, 127.5, 125.9, 124.5, 122.5, 121.4, 120.2, 119.8, 114.2, 55.5. HRMS (ESI) calculated for  $\text{C}_{30}\text{H}_{21}\text{NO}_2$   $[\text{M}+\text{H}]^+$  requires 428.1651, found 428.1623.

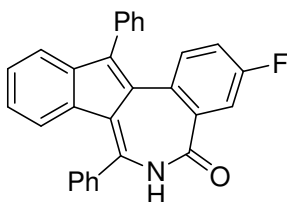

3-Fluoro-7,12-diphenylbenzo[*c*]indeno[2,1-*e*]azepin-5(6*H*)-one **3m**.  $^1\text{H}$  NMR (400 MHz,  $\text{CDCl}_3$ ):  $\delta$  8.07 (br, 1H), 7.87 (dd,  $J = 10, 2.8$  Hz, 1H), 7.65-7.57 (m, 5H), 7.45-7.44 (m, 4H), 7.40-7.38 (m, 2H), 7.37-7.32 (m, 1H), 7.18 (t,  $J = 7.2$  Hz, 1H), 6.91-6.87 (m, 2H), 6.09 (t,  $J = 8.0$  Hz, 1H).  $^{13}\text{C}$  NMR (100 MHz)  $\delta$  166.6, 161.1 (d,  $J_{(\text{C},\text{F})} = 247.3$  Hz), 140.9, 140.1, 138.6, 137.3, 136.1, 135.0, 134.9 (d,  $J_{(\text{C},\text{F})} = 7.2$  Hz), 131.6 (d,  $J_{(\text{C},\text{F})} = 7.1$  Hz), 131.2, 130.8, 130.3, 129.8, 129.7, 129.2, 128.5, 127.8, 126.1, 125.0, 122.5, 121.5, 120.1, 119.6 (d,  $J_{(\text{C},\text{F})} = 21.4$  Hz), 118.0 (d,  $J_{(\text{C},\text{F})} = 23.8$  Hz). HRMS (ESI) calculated for  $\text{C}_{29}\text{H}_{18}\text{FNO}$   $[\text{M}+\text{H}]^+$  requires 416.1451, found 416.1434.

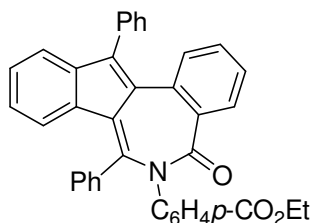

Ethyl 4-(5-oxo-7,12-diphenylbenzo[*c*]indeno[2,1-*e*]azepin-6(5*H*)-yl)benzoate **3n**.  $^1\text{H}$  NMR (400 MHz,  $\text{CDCl}_3$ ):  $\delta$  8.04 (d,  $J = 7.6$  Hz, 1H), 7.90 (d,  $J = 8.0$  Hz, 2H), 7.58 (m, 2H), 7.48-7.40 (m, 4H), 7.27-7.20 (m, 5H), 7.17-7.12 (m, 4H), 7.05-7.03 (m, 2H), 6.77 (t,  $J = 8.0$  Hz, 1H), 5.47 (t,  $J = 8.0$  Hz, 1H), 4.33 (q,  $J = 7.2$  Hz, 2H), 1.36 (t,  $J = 7.2$  Hz, 3H).  $^{13}\text{C}$  NMR (100 MHz)  $\delta$  170.2, 165.8, 145.2, 141.4, 141.1, 140.8, 137.1, 136.4, 135.8, 134.7, 132.5, 132.3, 131.9, 131.5, 131.2, 130.34, 130.30, 130.0, 129.9, 129.4, 129.0, 128.6, 128.5, 128.0, 127.1, 127.0, 126.1, 124.9, 122.1, 120.3, 61.1, 14.2. HRMS (ESI) calculated for  $\text{C}_{38}\text{H}_{27}\text{NO}_3$   $[\text{M}+\text{H}]^+$  requires 546.2069, found 546.2054.

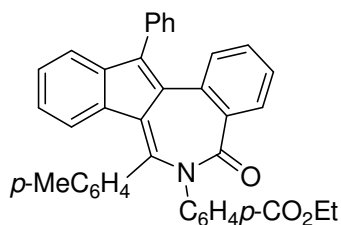

Ethyl 4-(5-oxo-12-phenyl-7-(*p*-tolyl)benzo[*c*]indeno[2,1-*e*]azepin-6(5*H*)-yl)benzoate **3o**.  $^1\text{H}$  NMR (400 MHz,  $\text{CDCl}_3$ ):  $\delta$  8.03 (d,  $J = 8.0$  Hz, 1H), 7.91 (d,  $J = 8.4$  Hz, 2H), 7.59-7.57 (m, 2H), 7.47-7.39 (m, 4H), 7.26-7.12 (m, 6H), 7.03-7.01 (m, 2H), 6.92-6.90 (m, 2H), 6.80 (t,  $J = 7.6$  Hz, 1H), 5.53 (d,  $J = 8.0$  Hz, 1H), 4.34 (q,  $J = 7.2$  Hz, 2H), 2.32 (s, 3H), 1.37 (t,  $J = 7.2$  Hz, 3H).  $^{13}\text{C}$  NMR (100 MHz)  $\delta$  170.3, 165.9, 147.2, 145.2, 141.7, 141.0, 140.6, 138.5, 137.3, 135.9, 134.7, 133.4, 132.4, 132.2, 132.0, 131.4, 131.2, 130.3, 130.1, 129.98, 129.93, 129.3, 129.2, 129.0, 127.9, 127.0, 126.0, 124.9, 122.1, 120.3, 21.4, 14.2. HRMS (ESI) calculated for  $\text{C}_{39}\text{H}_{29}\text{NO}_3$   $[\text{M}+\text{H}]^+$  requires 560.2226, found 560.2189.

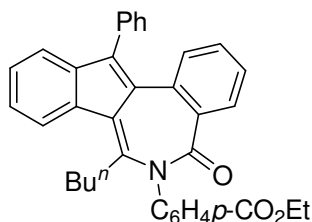



Ethyl 4-(7-butyl-5-oxo-12-phenylbenzo[*c*]indeno[2,1-*e*]azepin-6(5*H*)-yl)benzoate **3p**.  $^1\text{H}$  NMR (400 MHz,  $\text{CDCl}_3$ ):  $\delta$  8.16 (d,  $J = 8.4$  Hz, 2H), 7.97 (d,  $J = 8.0$  Hz, 1H), 7.62 (d,  $J = 6.8$  Hz, 1H), 7.58-7.55 (m, 3H), 7.46-7.39 (m, 5H), 7.35-7.32 (m, 2H), 7.25-7.22 (m, 1H), 7.11 (t,  $J = 8.0$  Hz, 1H), 7.04-7.02 (m, 1H), 4.41 (q,  $J = 7.6$  Hz, 2H), 2.69 (t,  $J = 8.0$  Hz, 2H), 1.65-1.62 (m, 2H), 1.42 (t,  $J = 6.8$  Hz, 3H), 0.88-0.84 (m, 2H), 0.79 (t,  $J = 7.6$  Hz, 3H).  $^{13}\text{C}$  NMR (100 MHz)  $\delta$  169.9, 165.8, 147.3, 146.4, 145.4, 141.6, 140.9, 136.6, 135.5, 134.9, 133.2, 131.9, 131.8, 131.7, 131.1, 130.7, 130.1, 130.0, 129.0, 128.9, 128.1, 127.0, 126.4, 125.9, 121.9, 121.4, 61.2, 34.3, 32.5, 22.4, 14.3, 13.8. HRMS (ESI) calculated for  $\text{C}_{36}\text{H}_{31}\text{NO}_3$   $[\text{M}+\text{H}]^+$  requires 526.2382, found 526.2368.

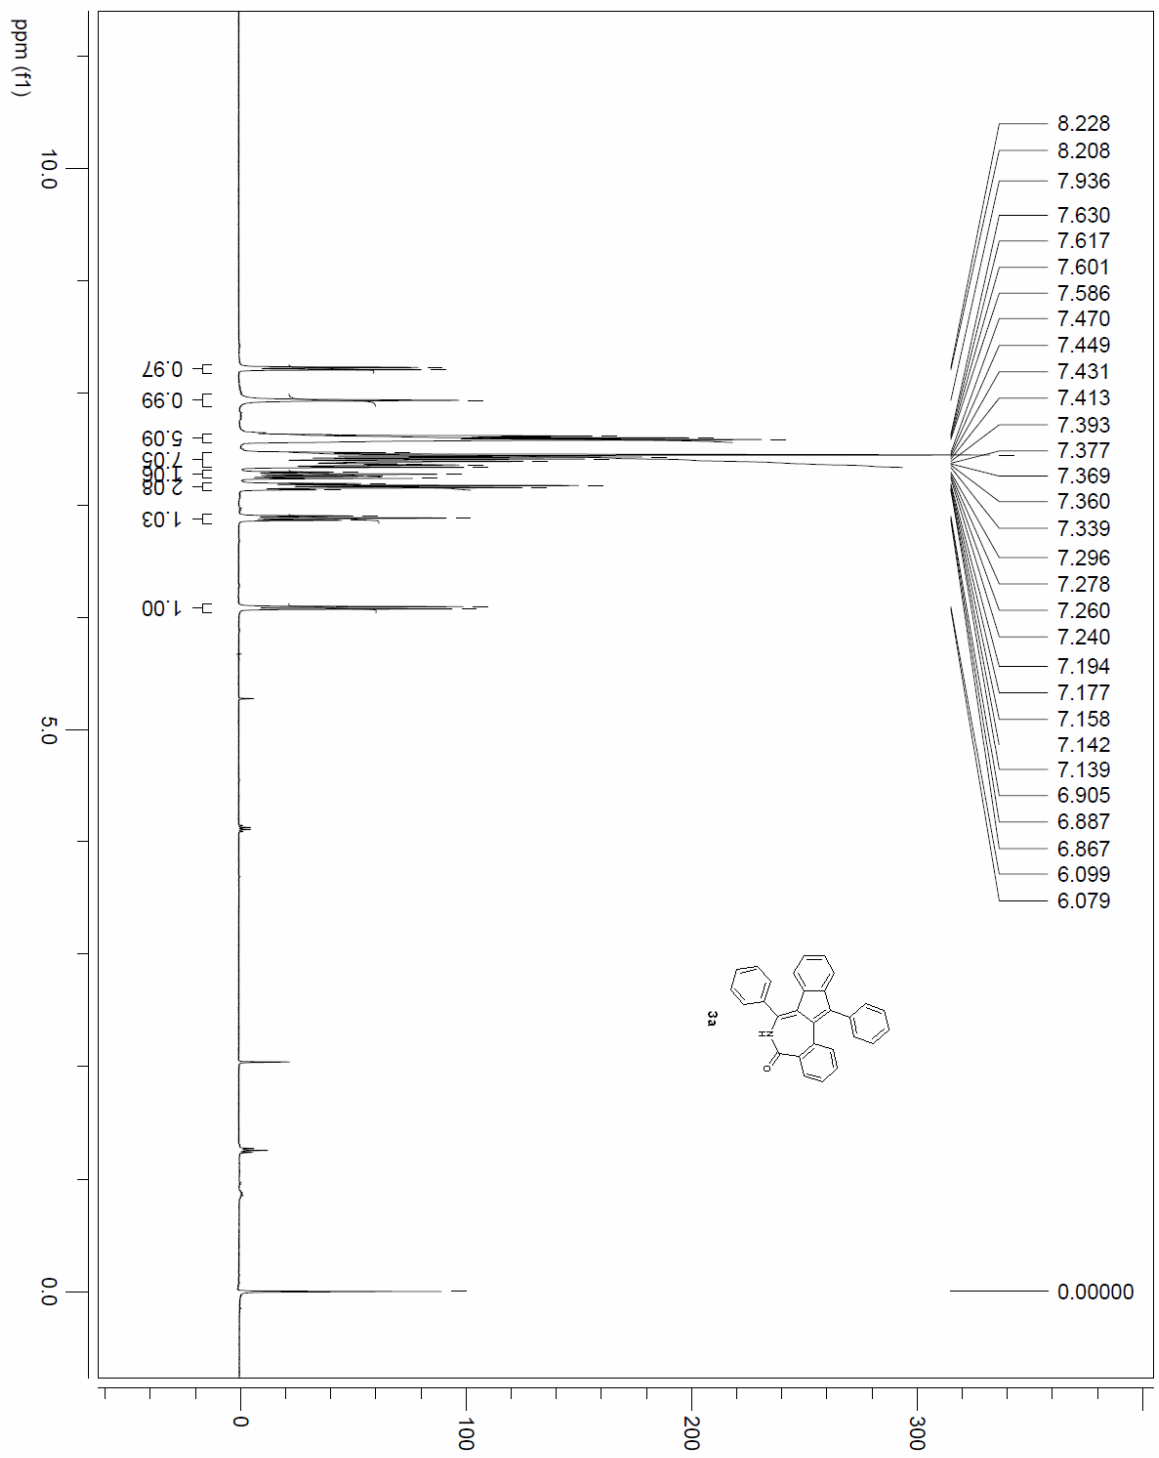

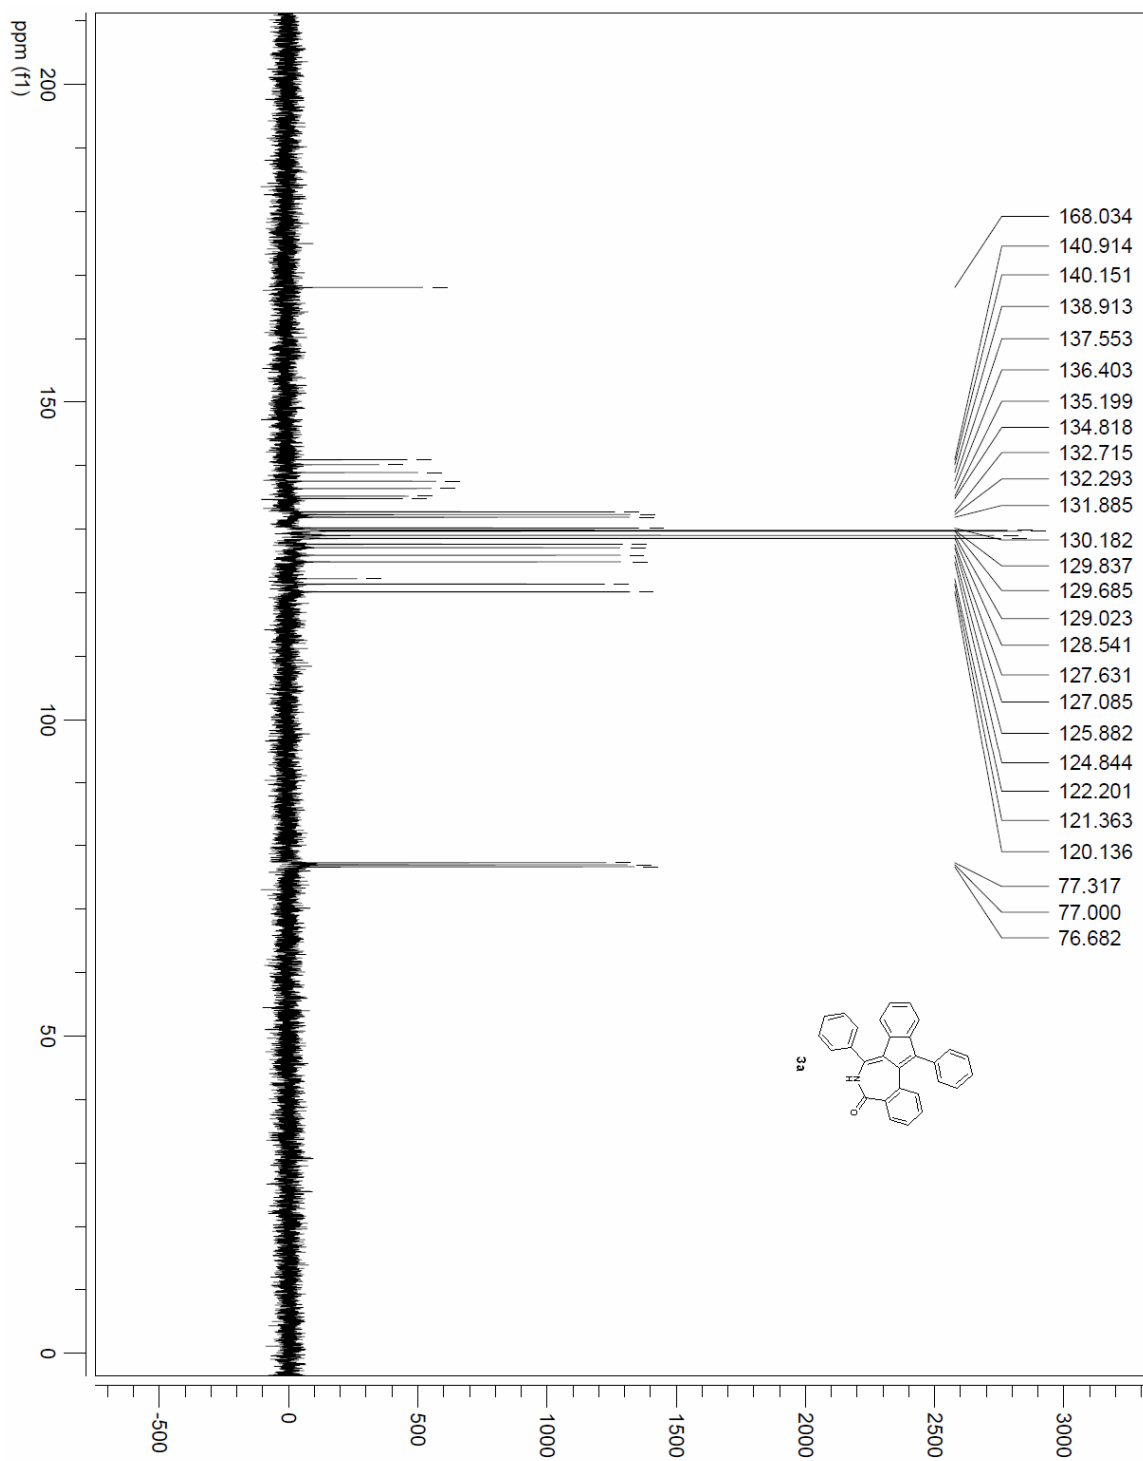

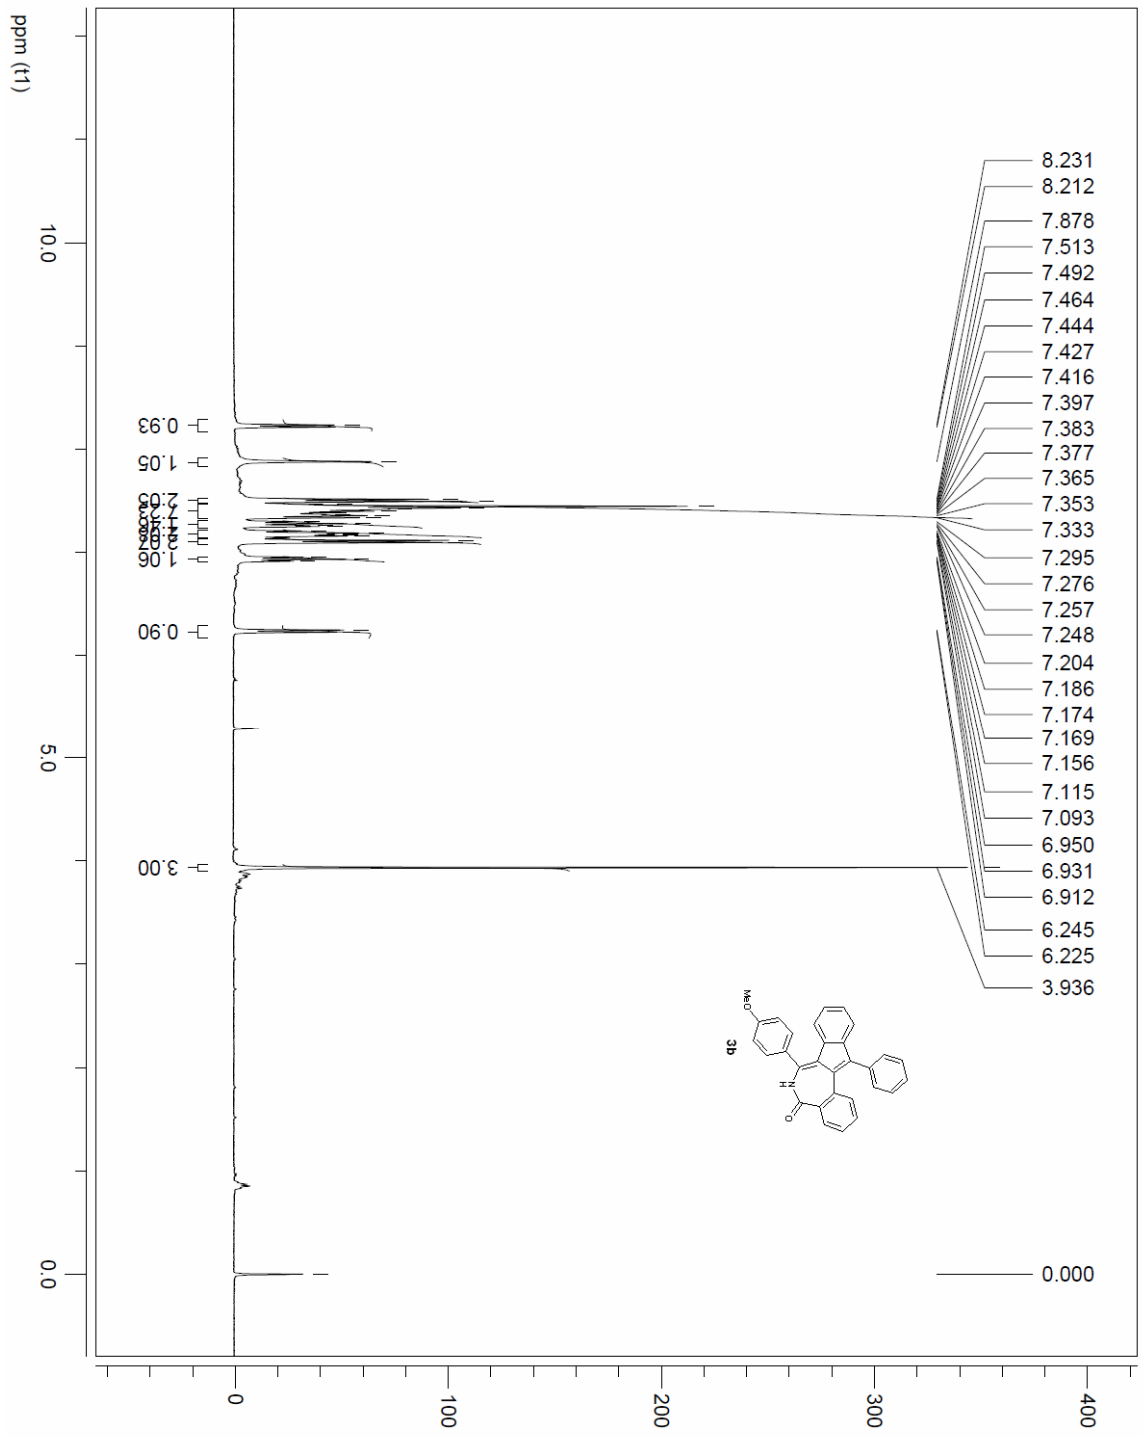

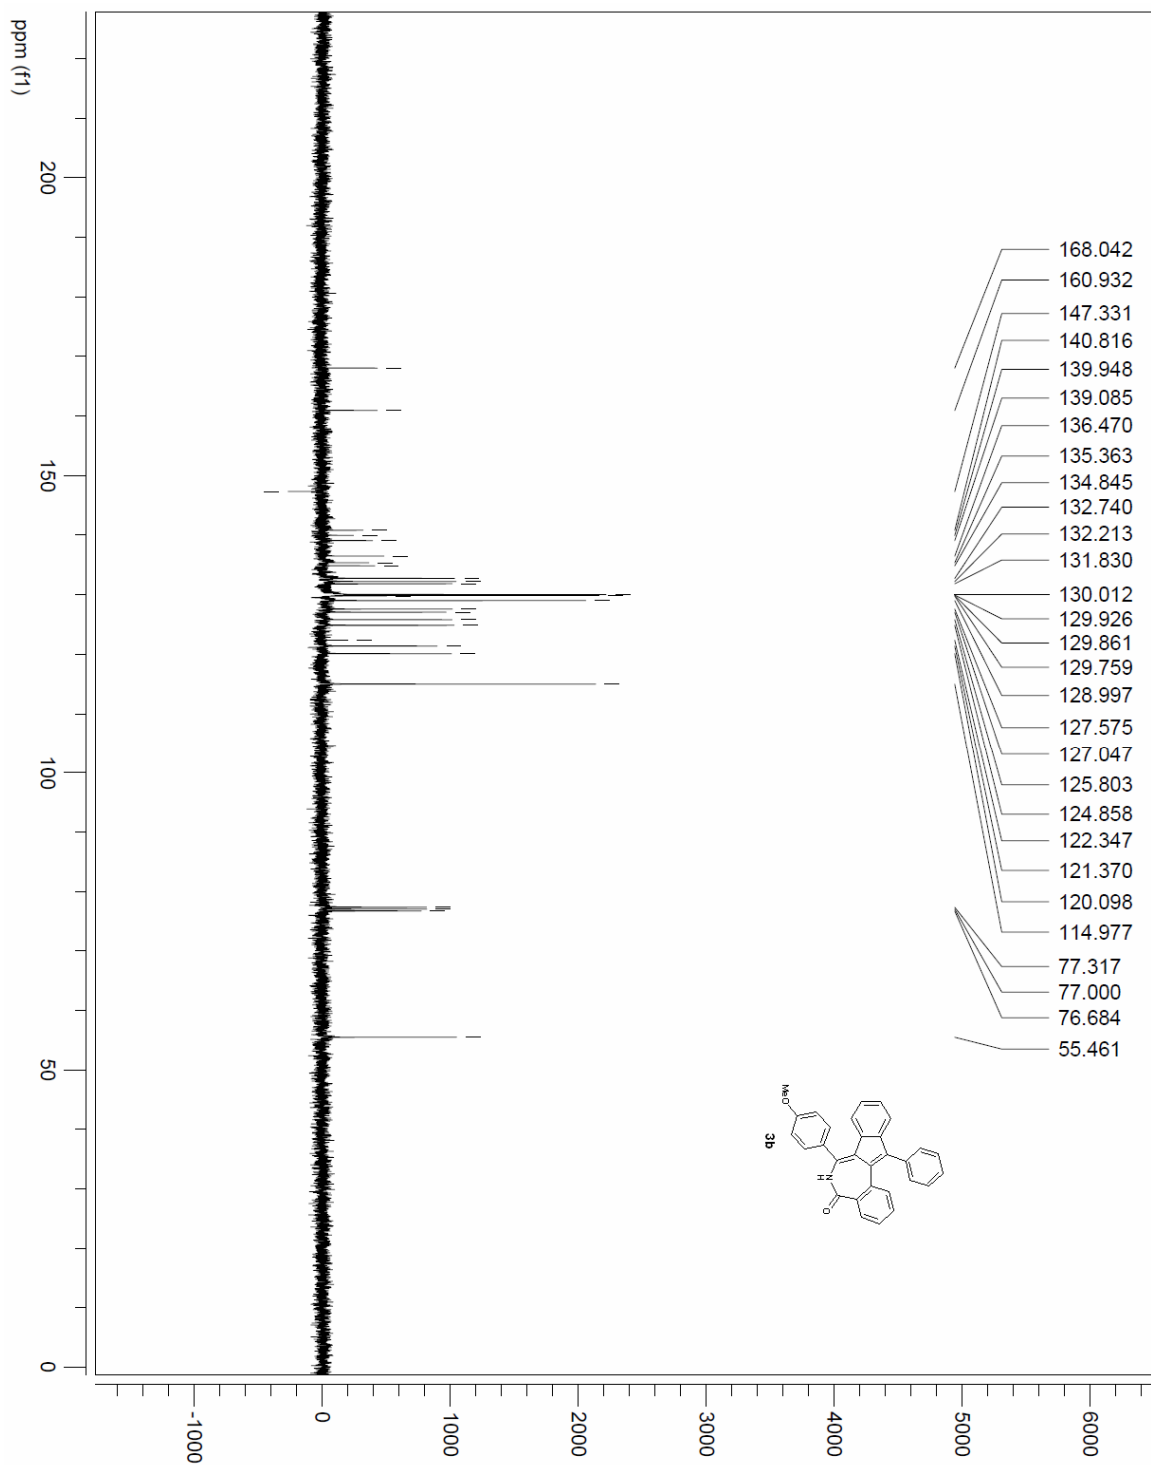



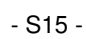

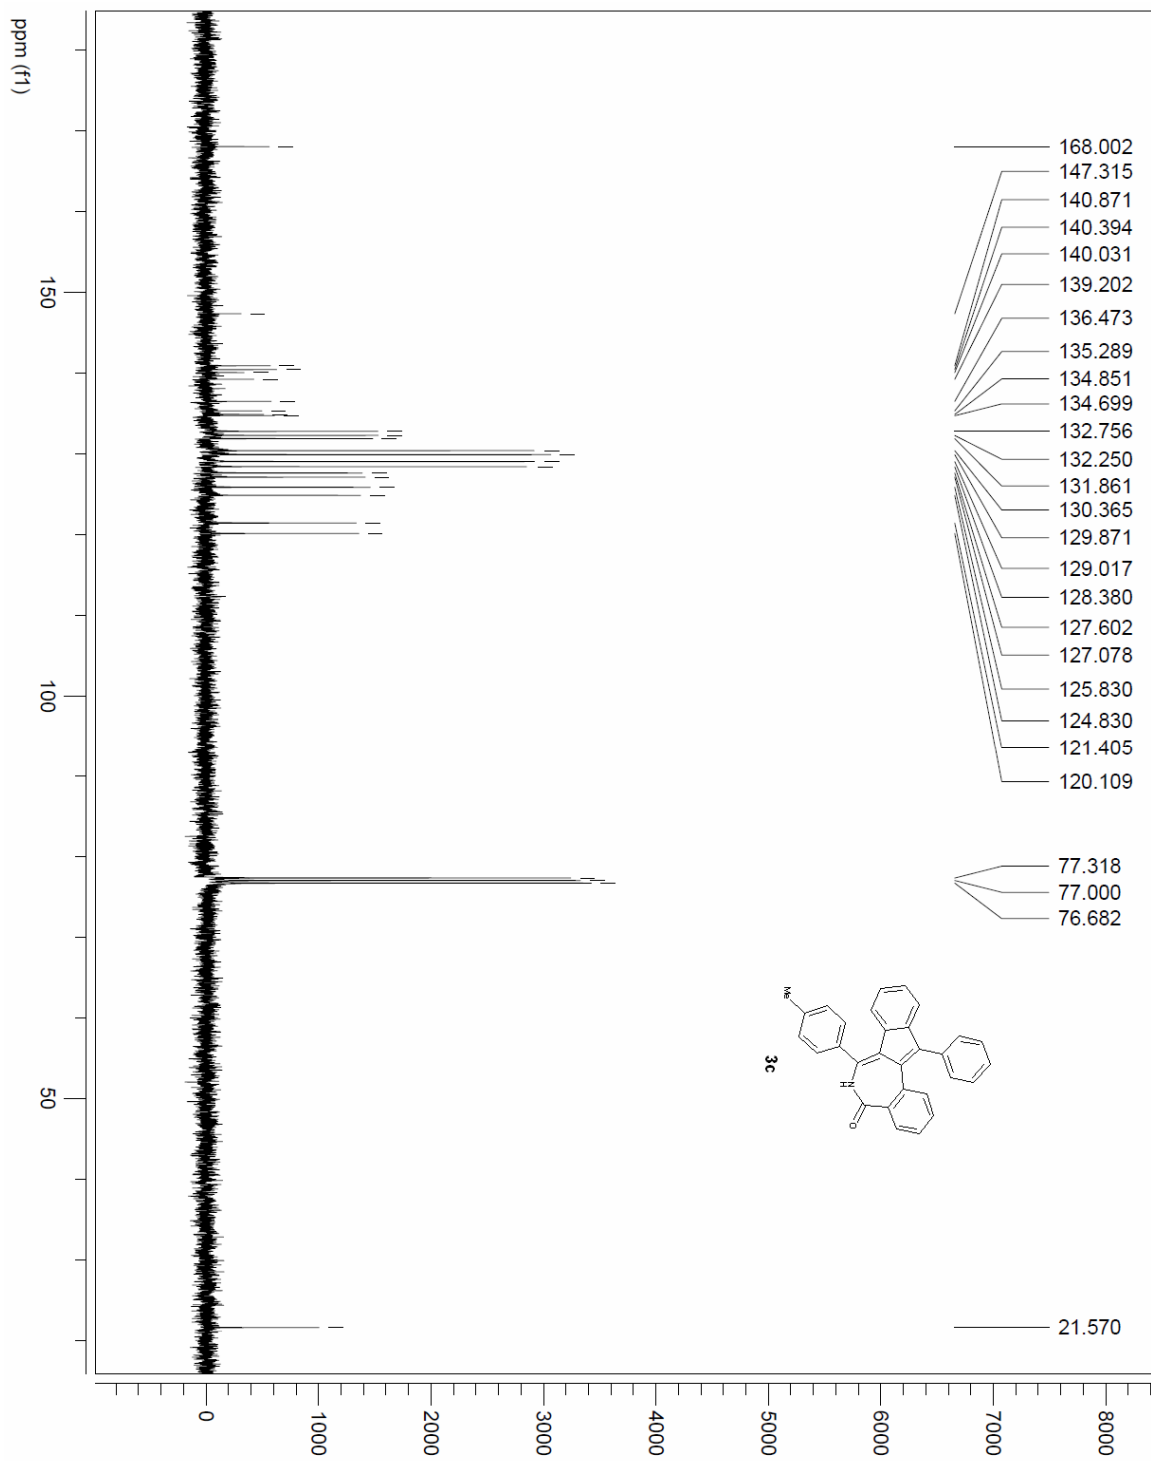



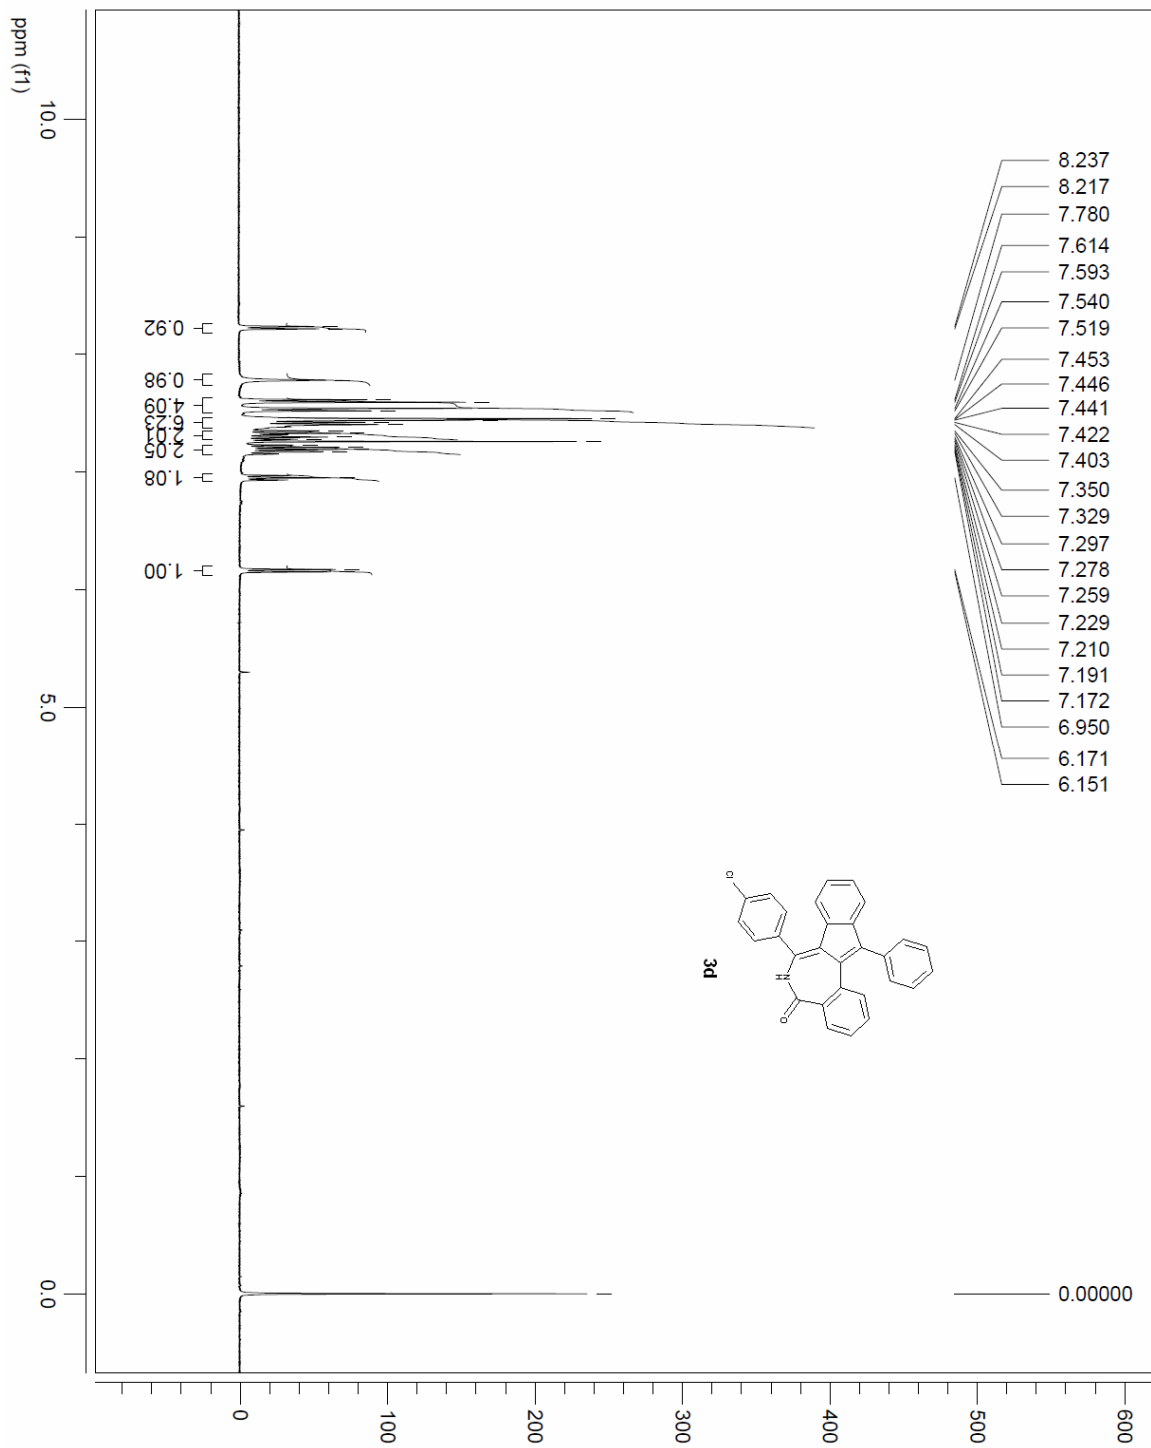



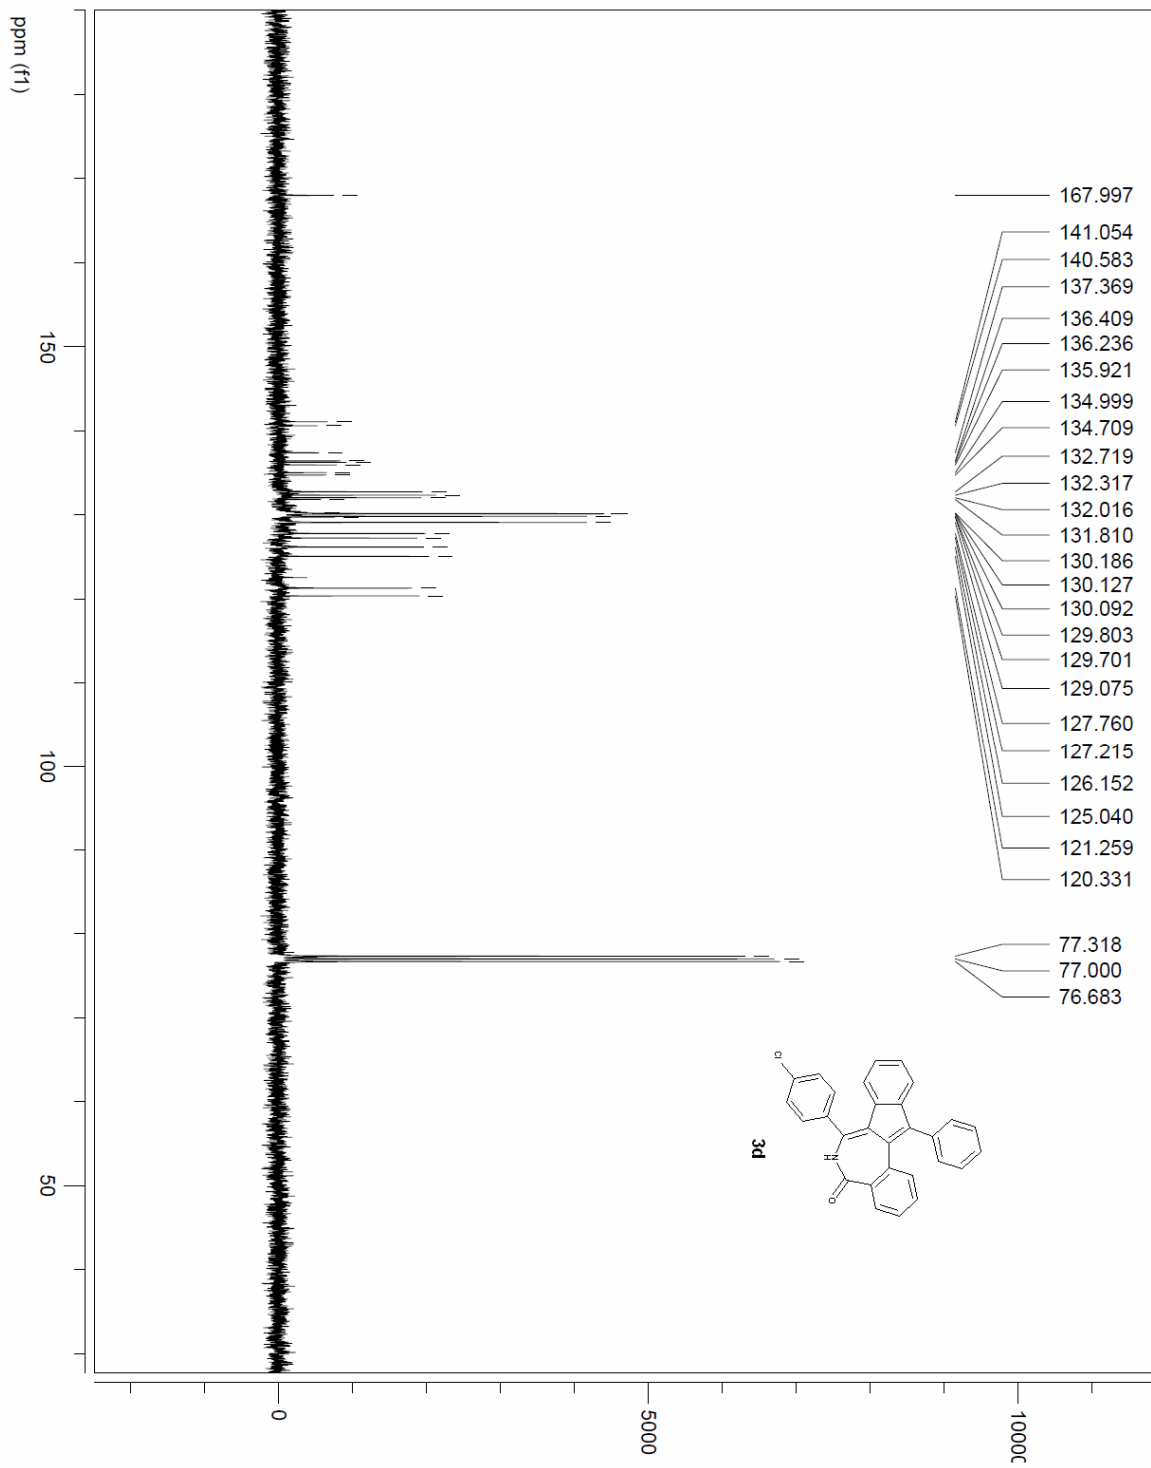

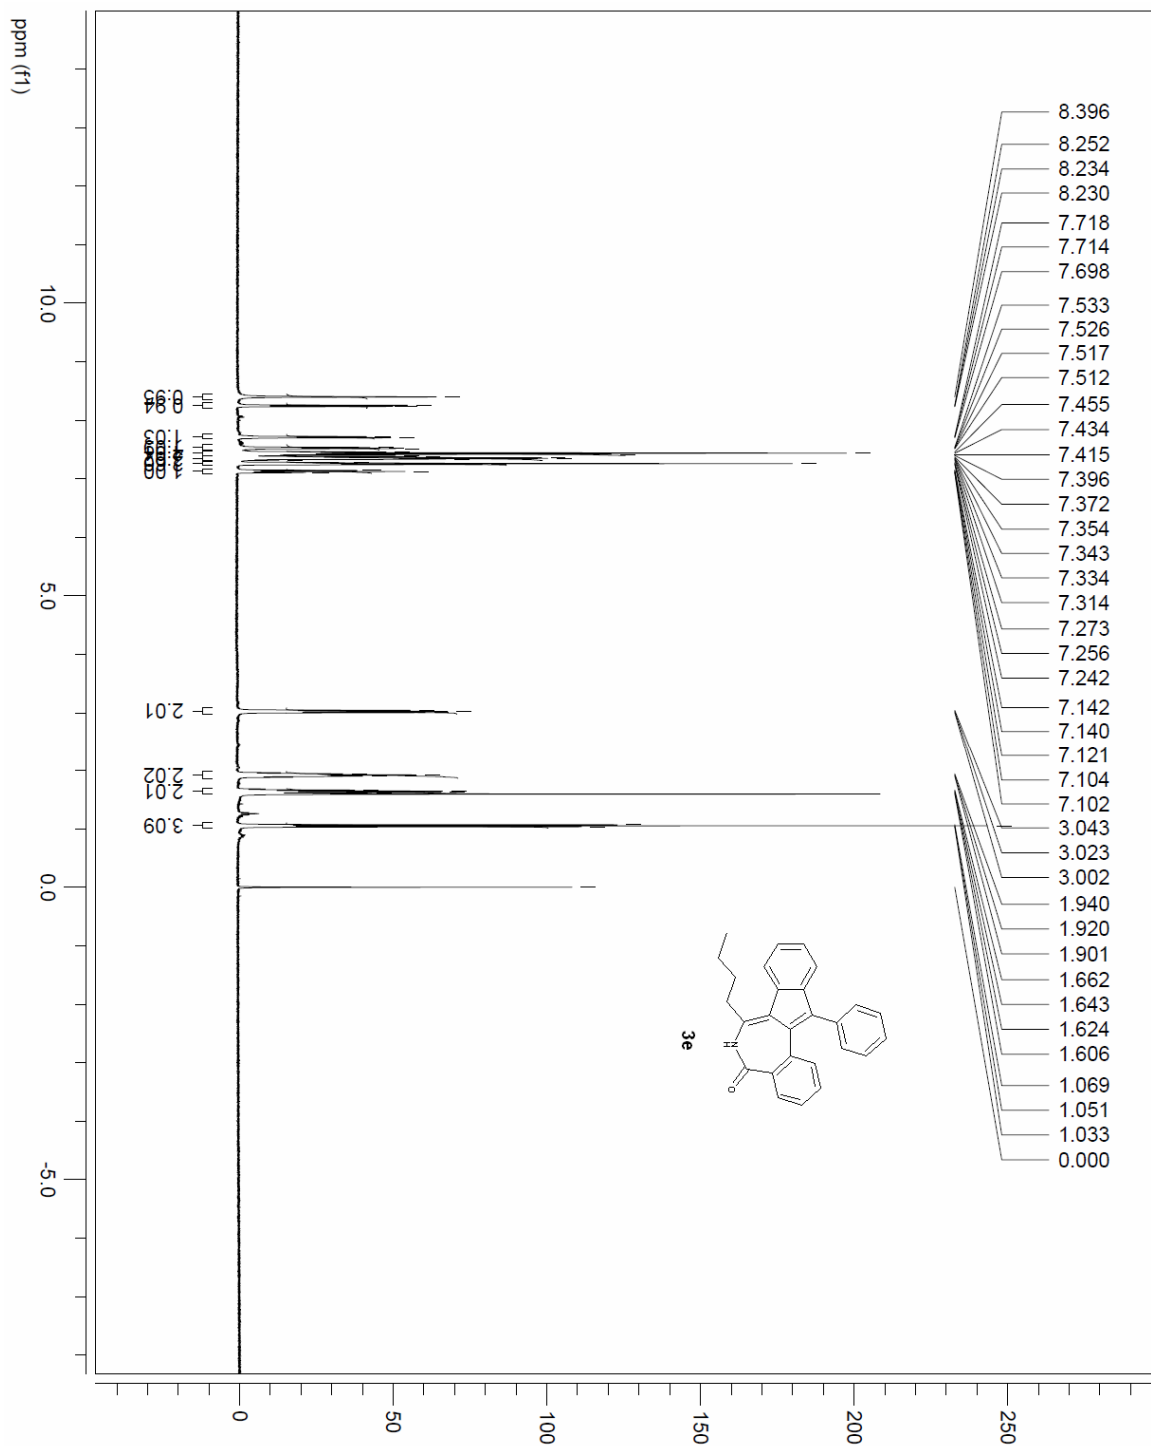

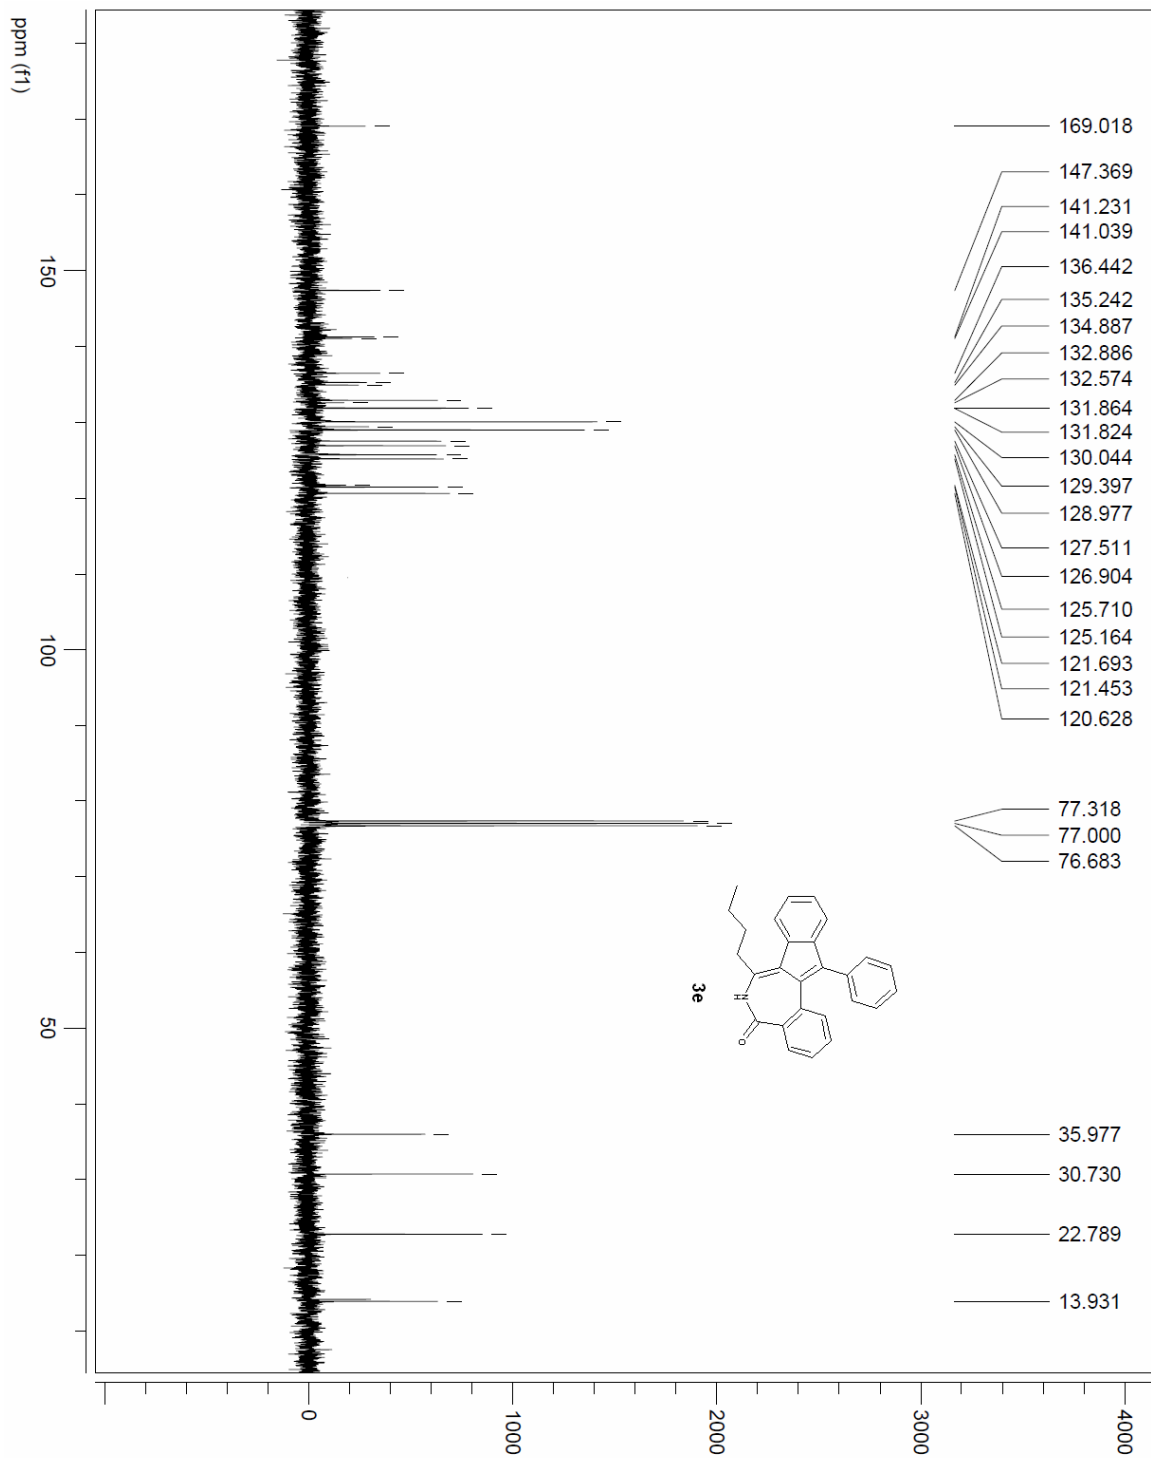



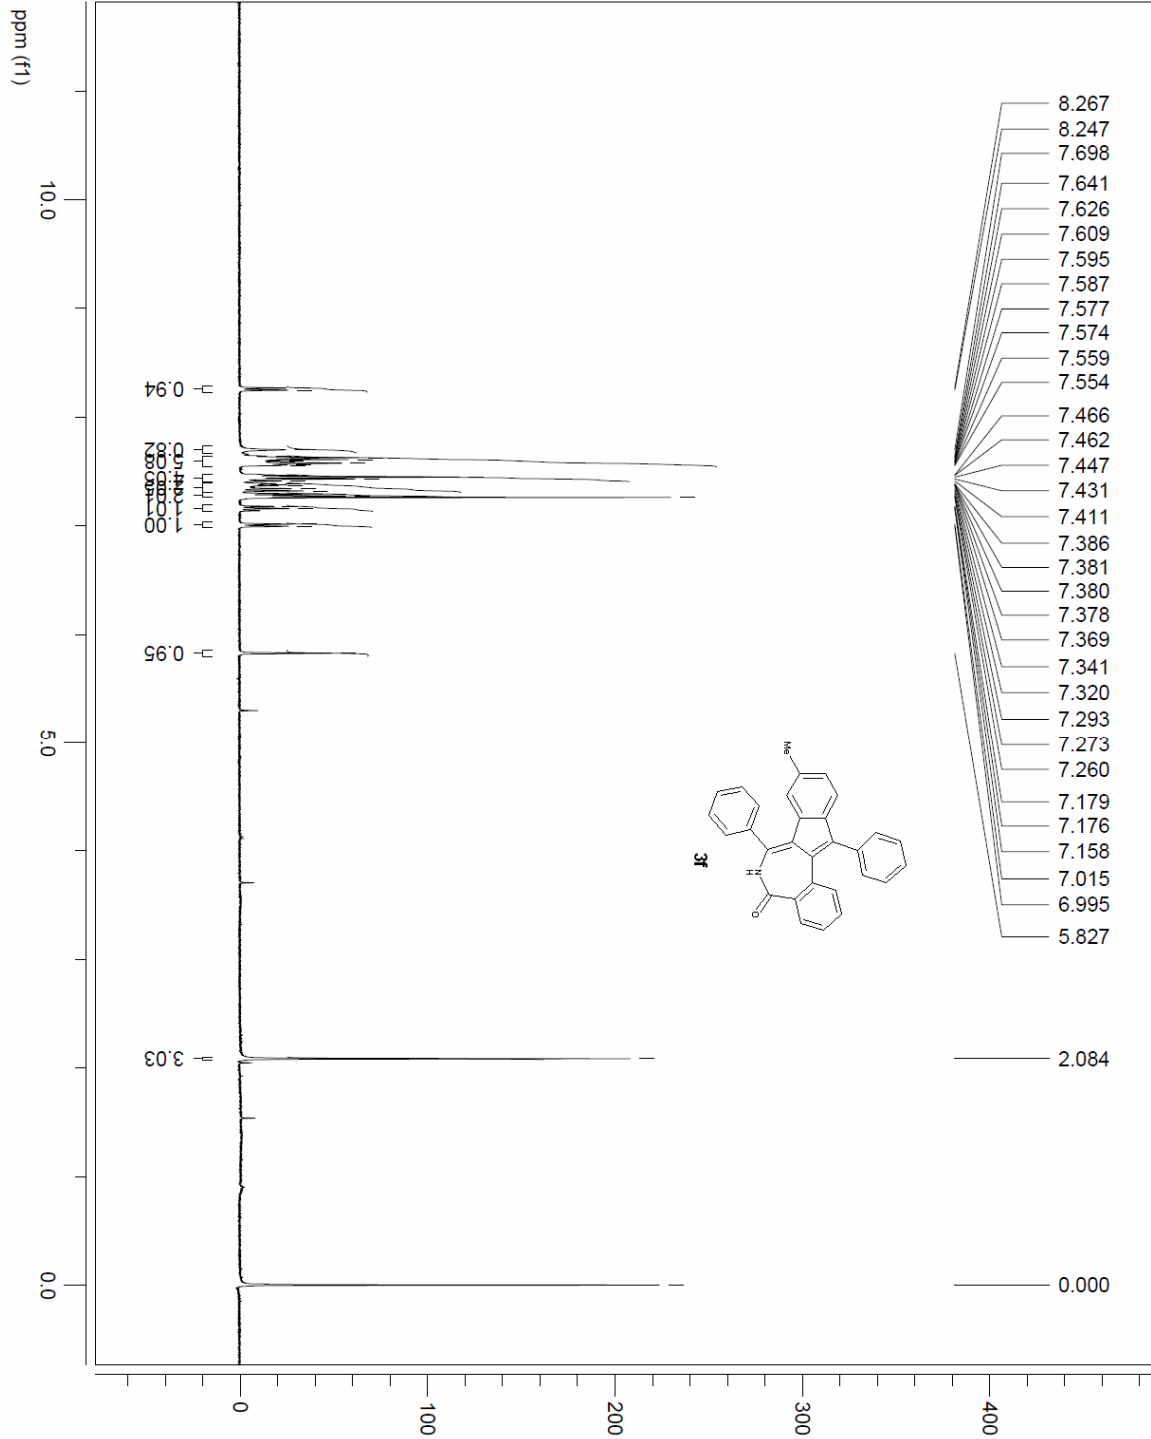

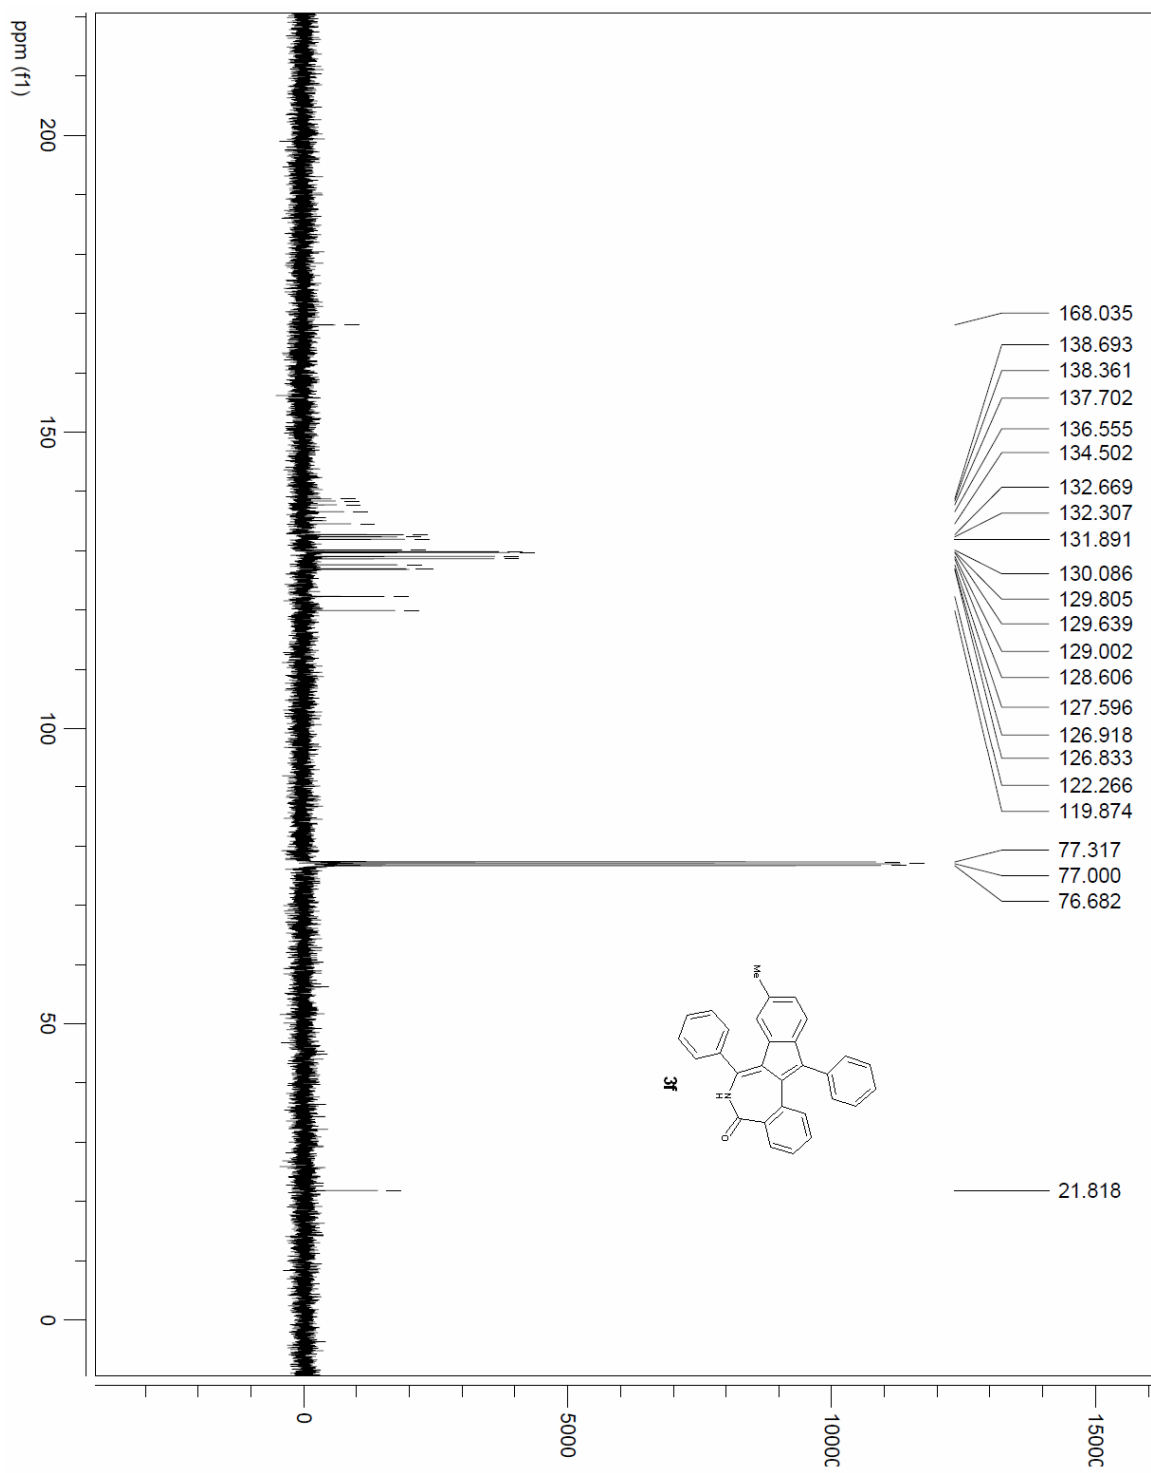



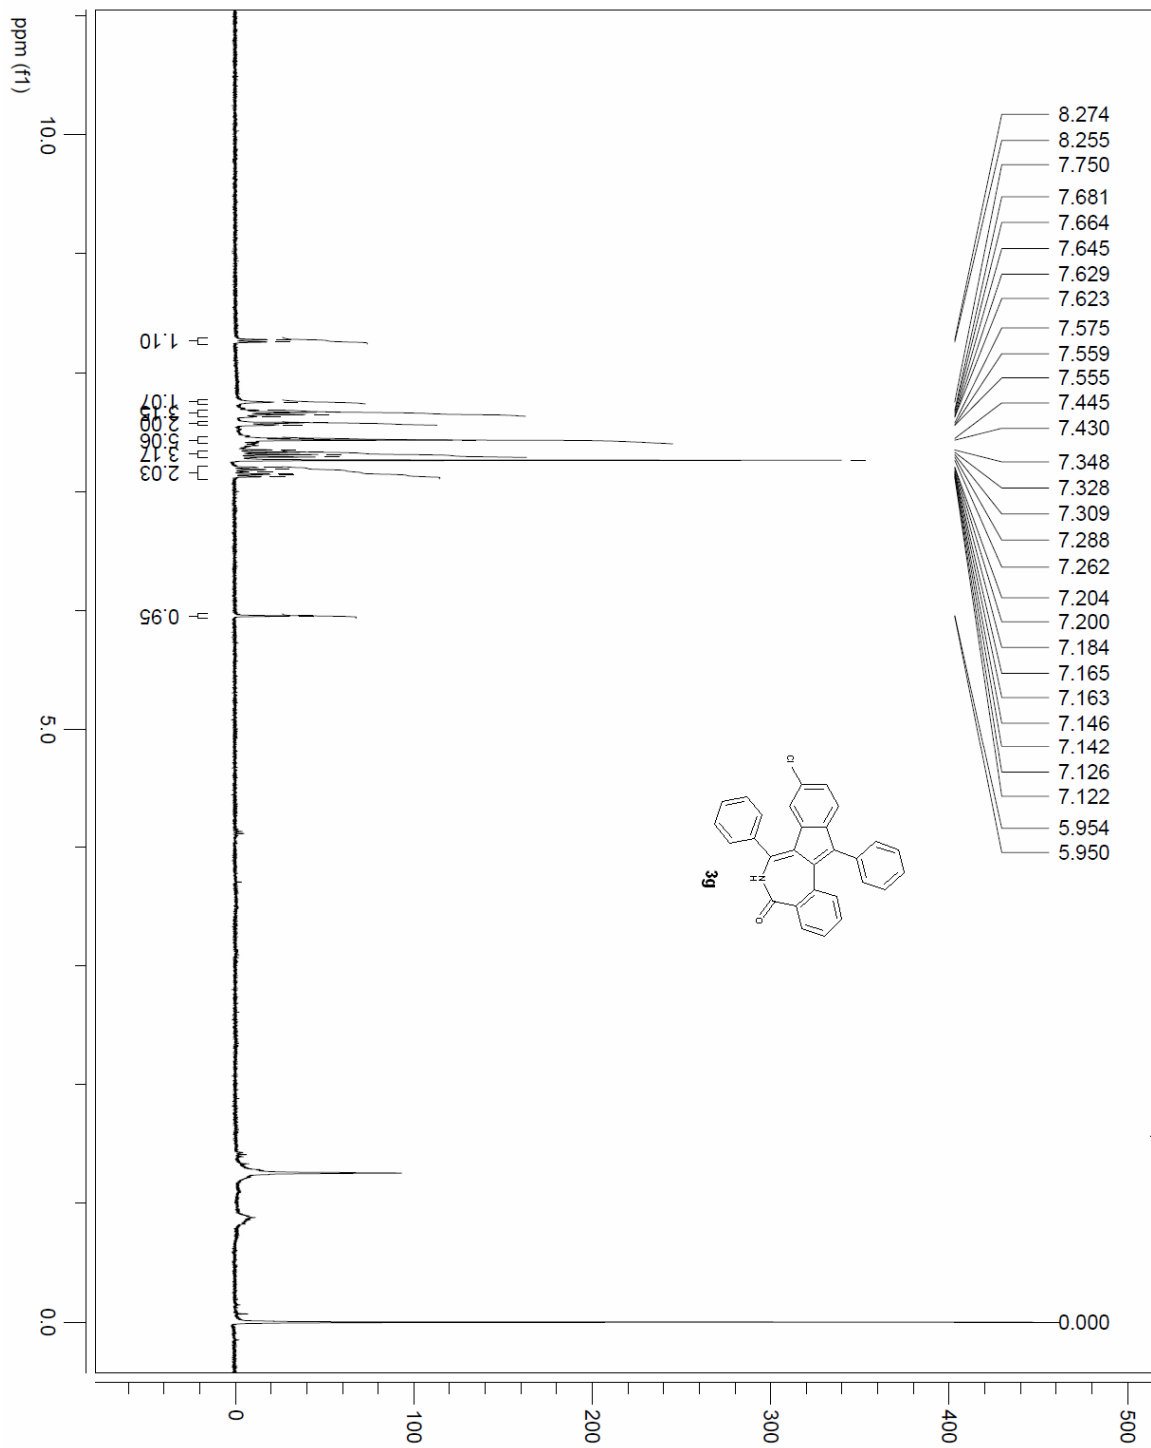



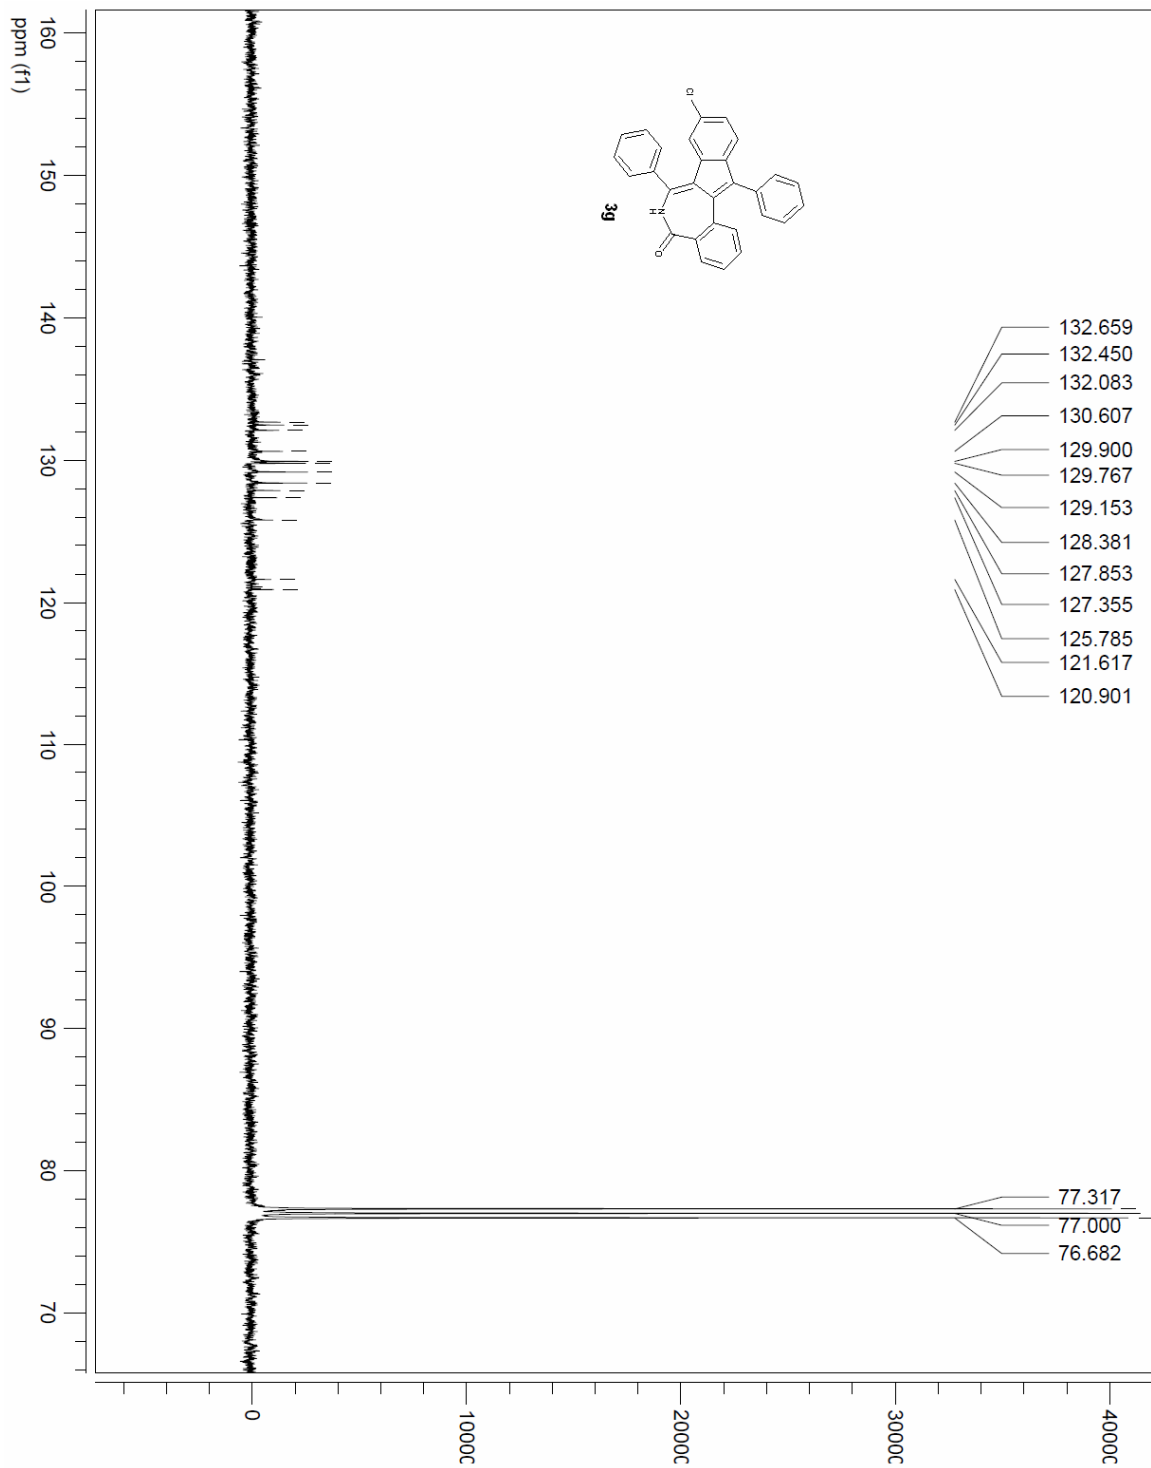

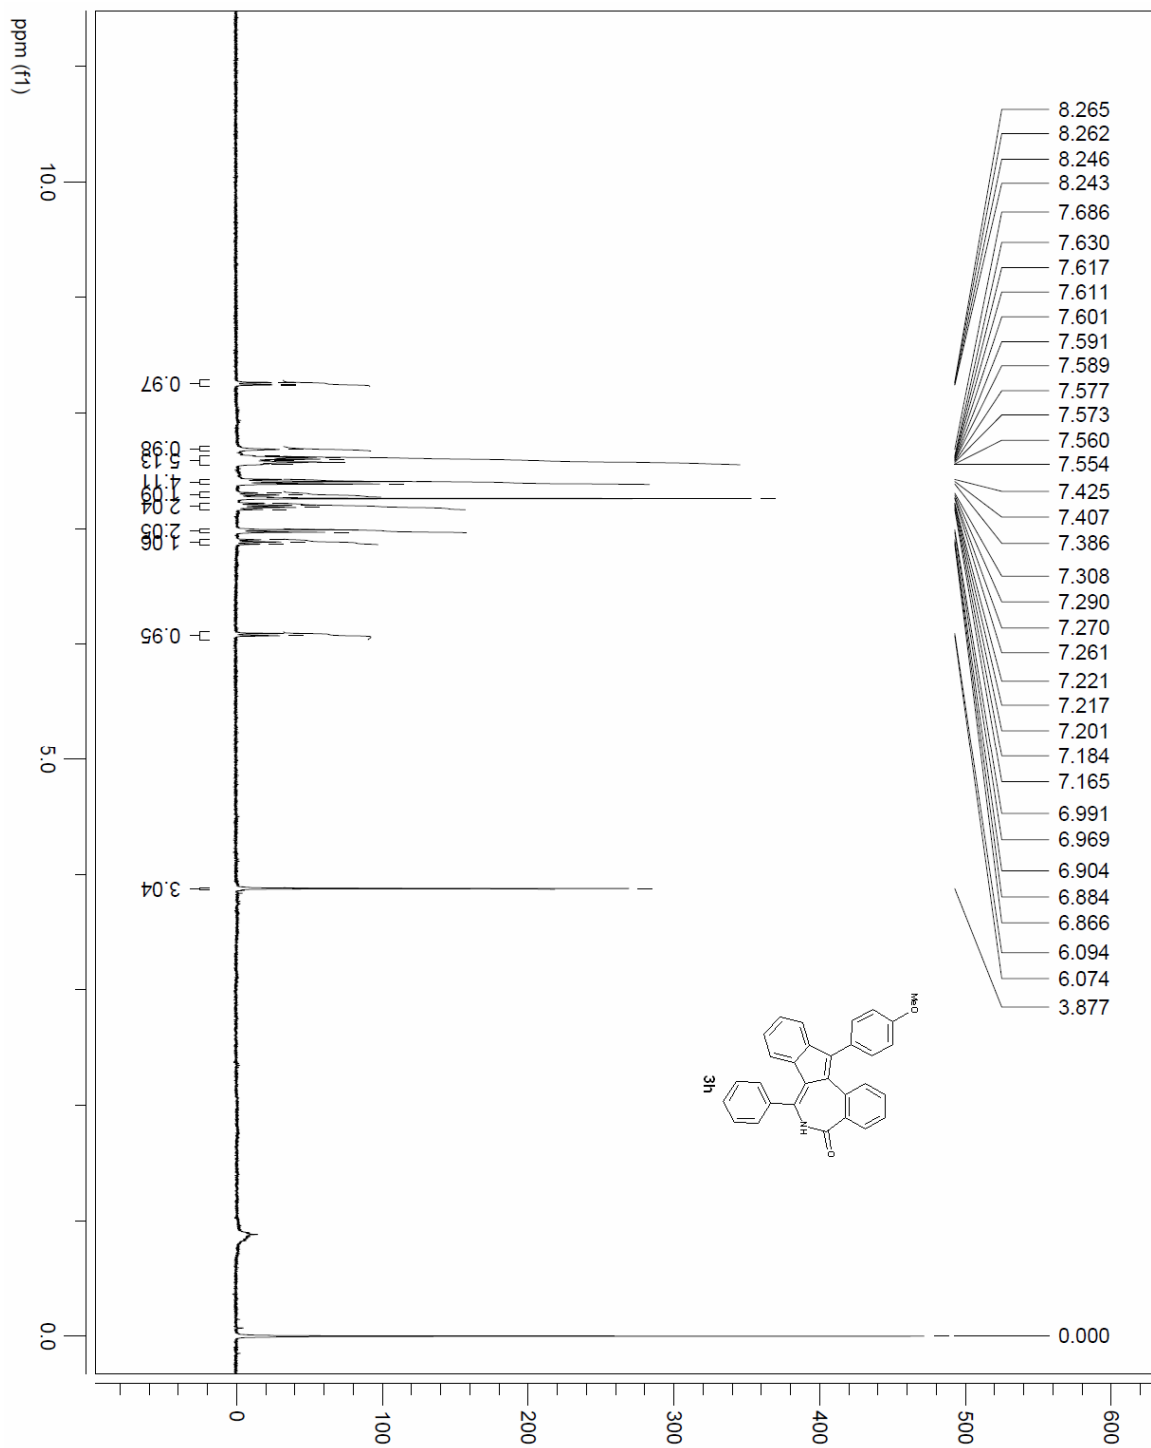

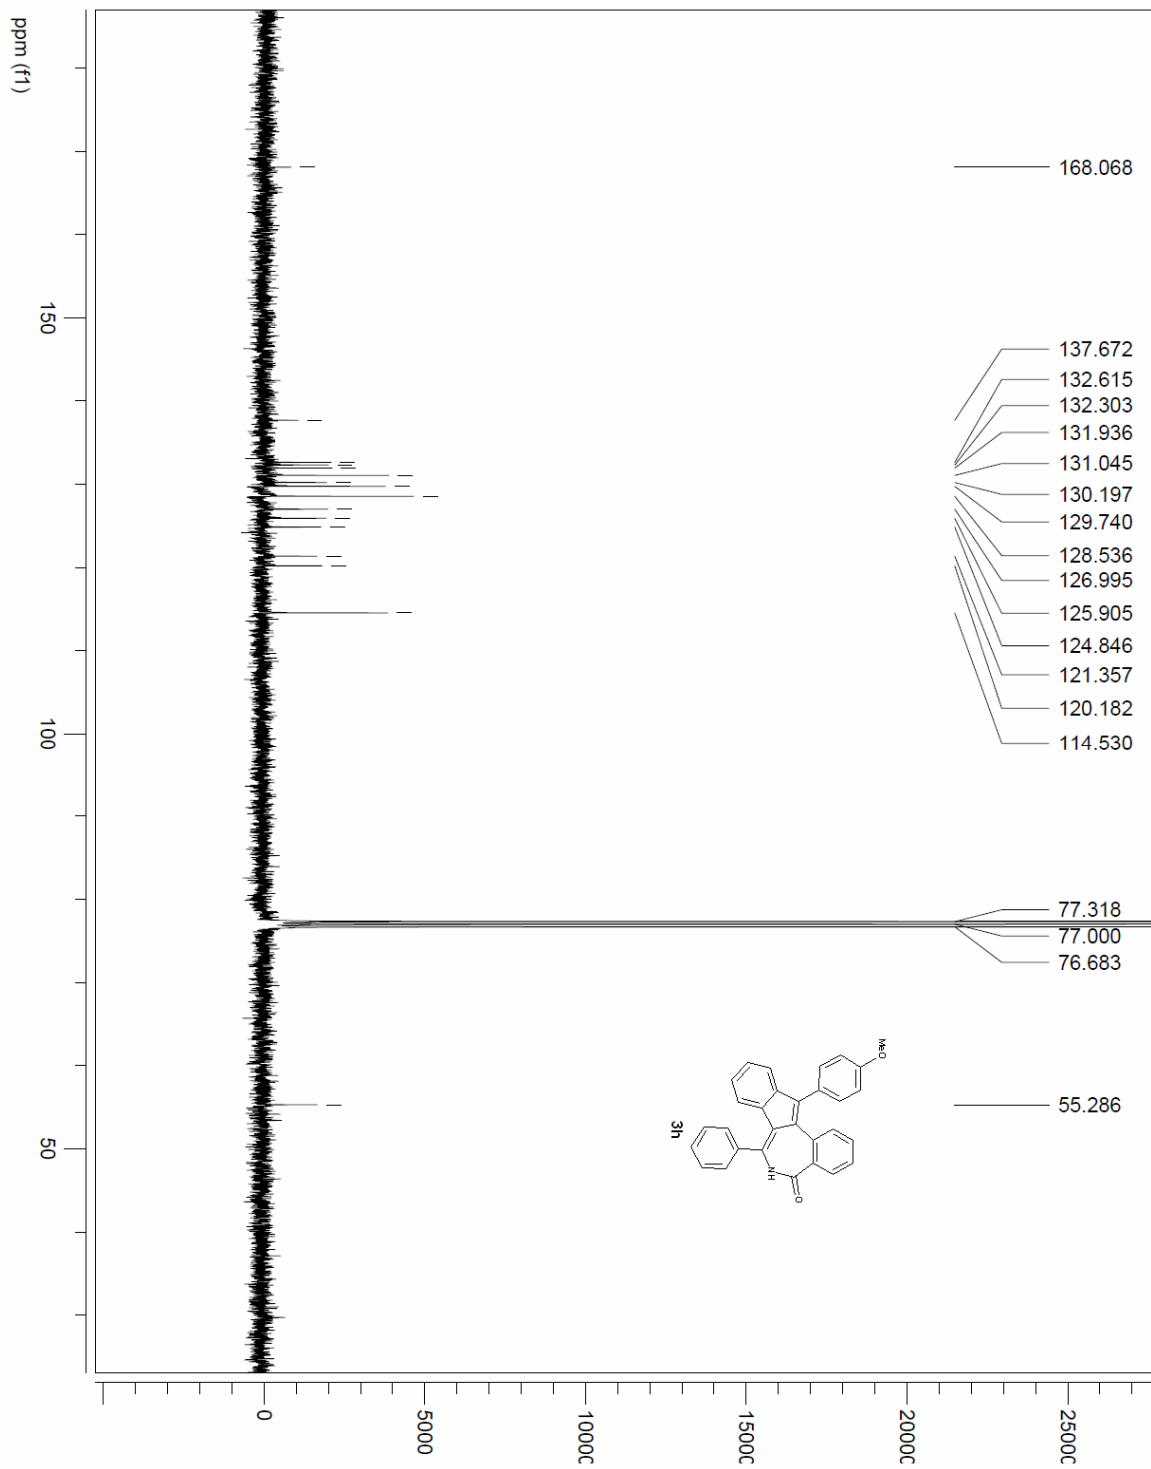



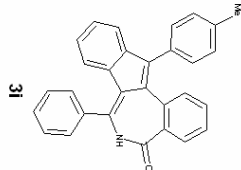

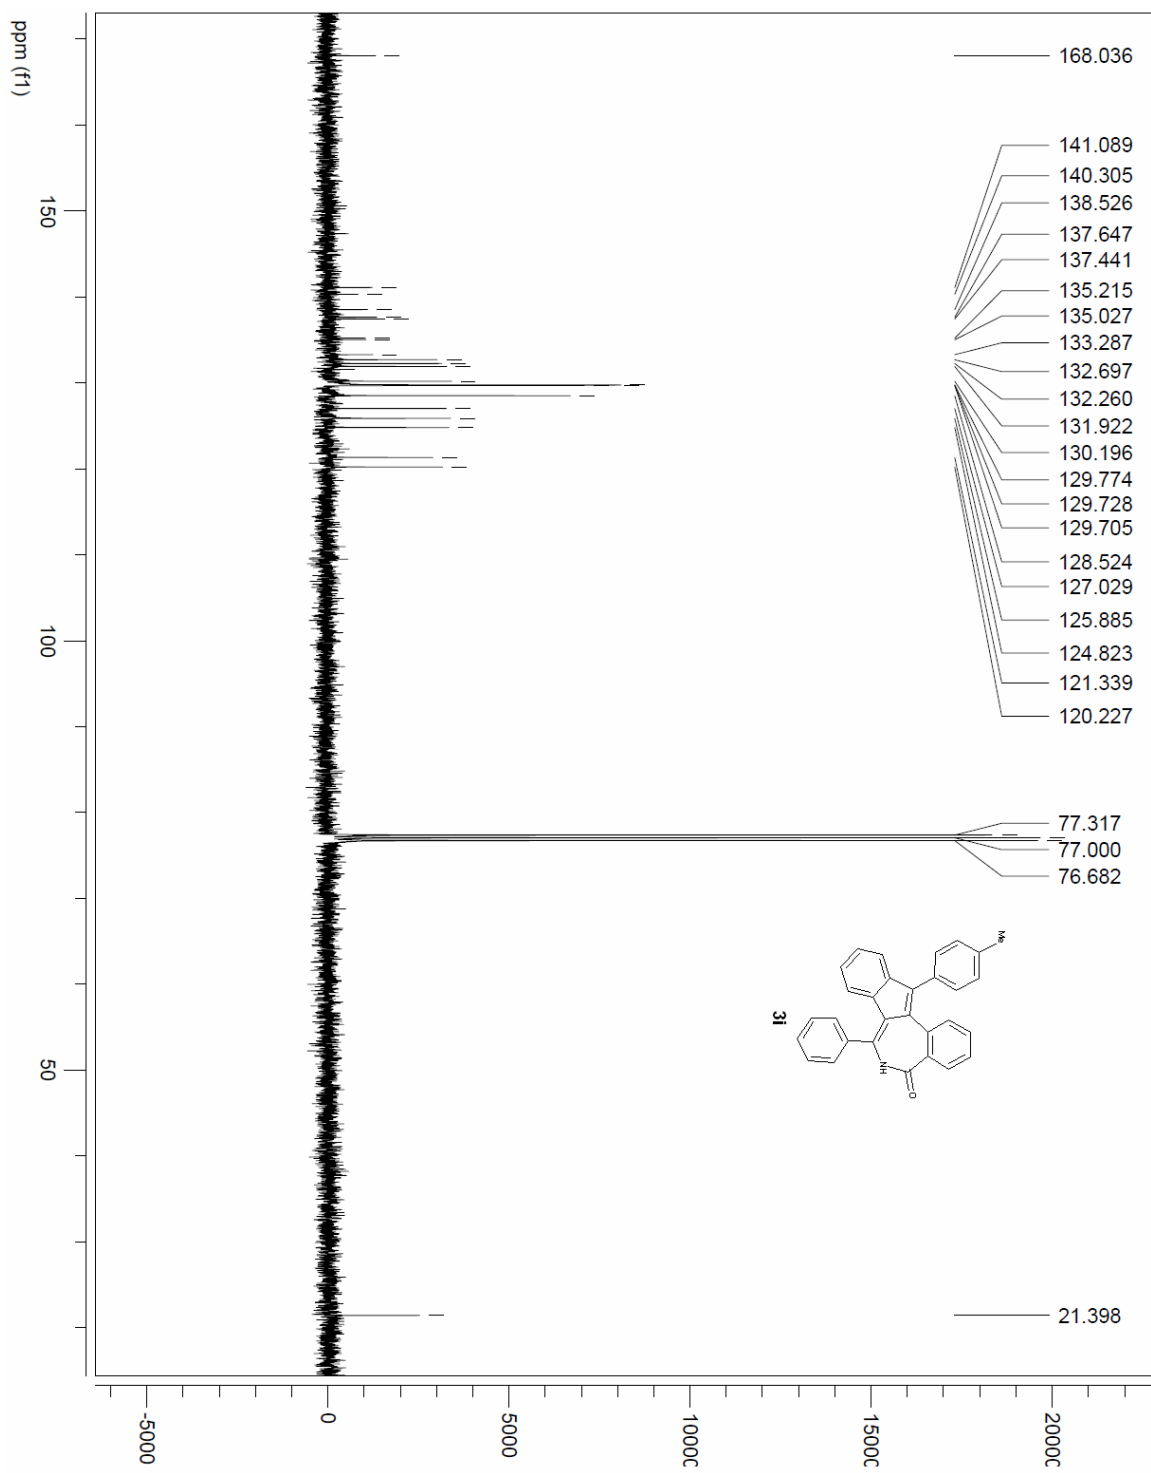



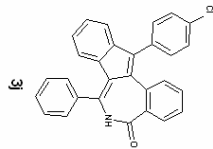



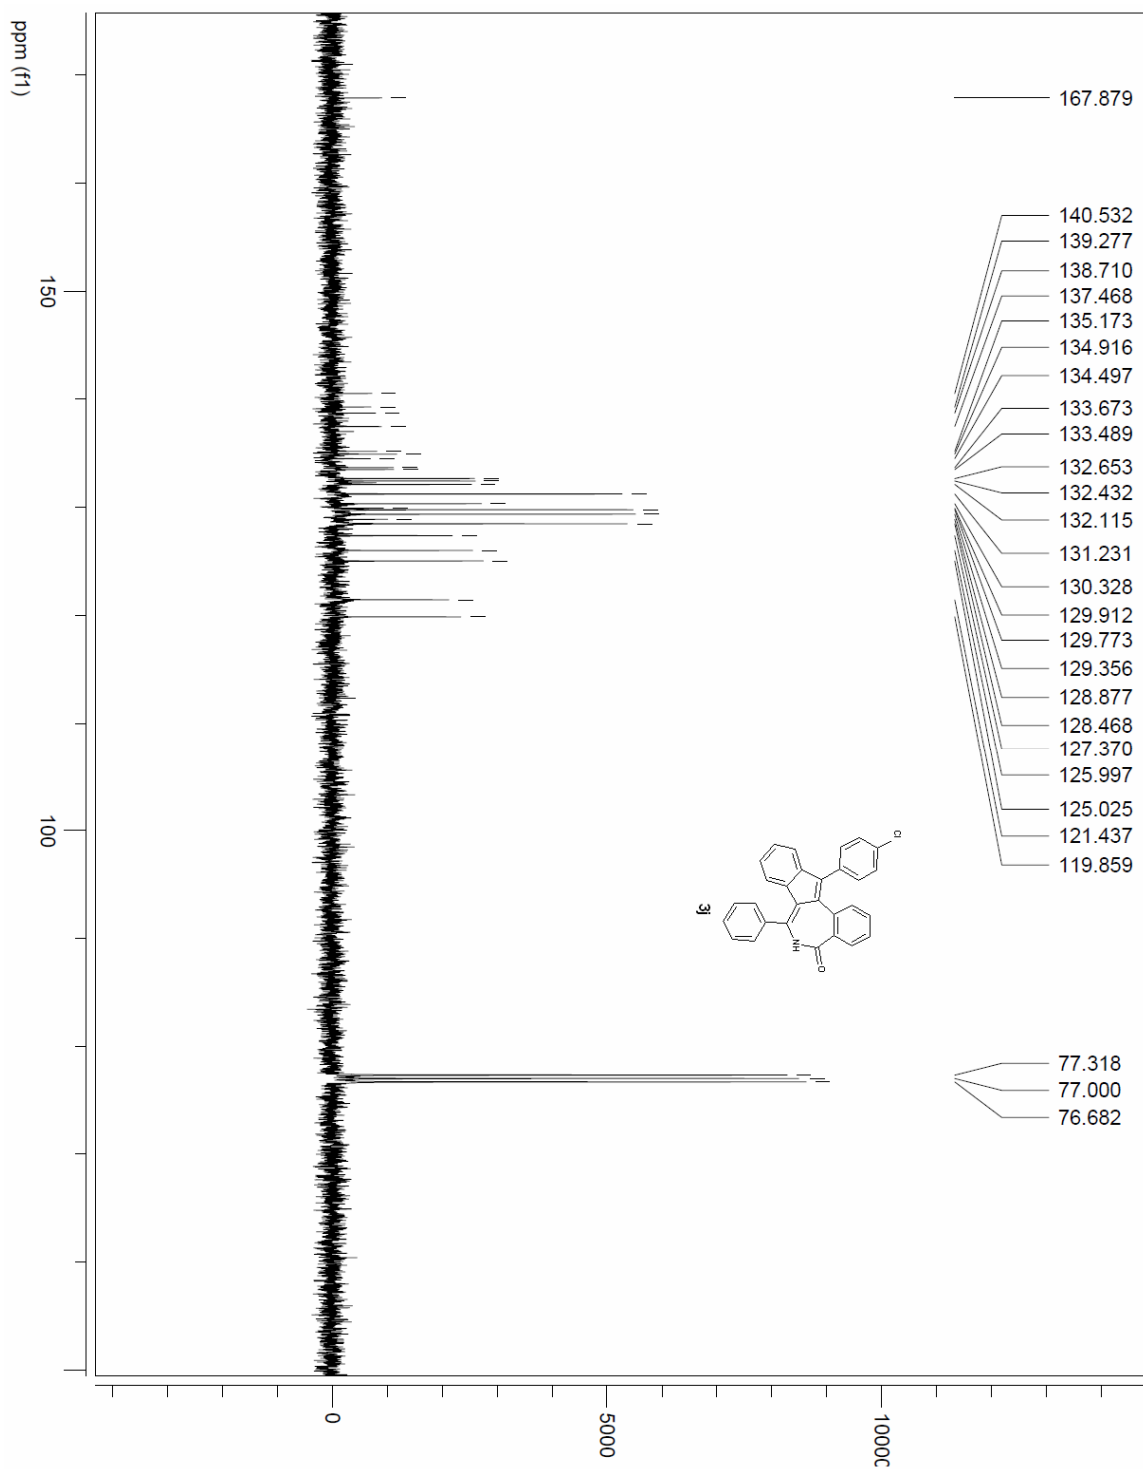

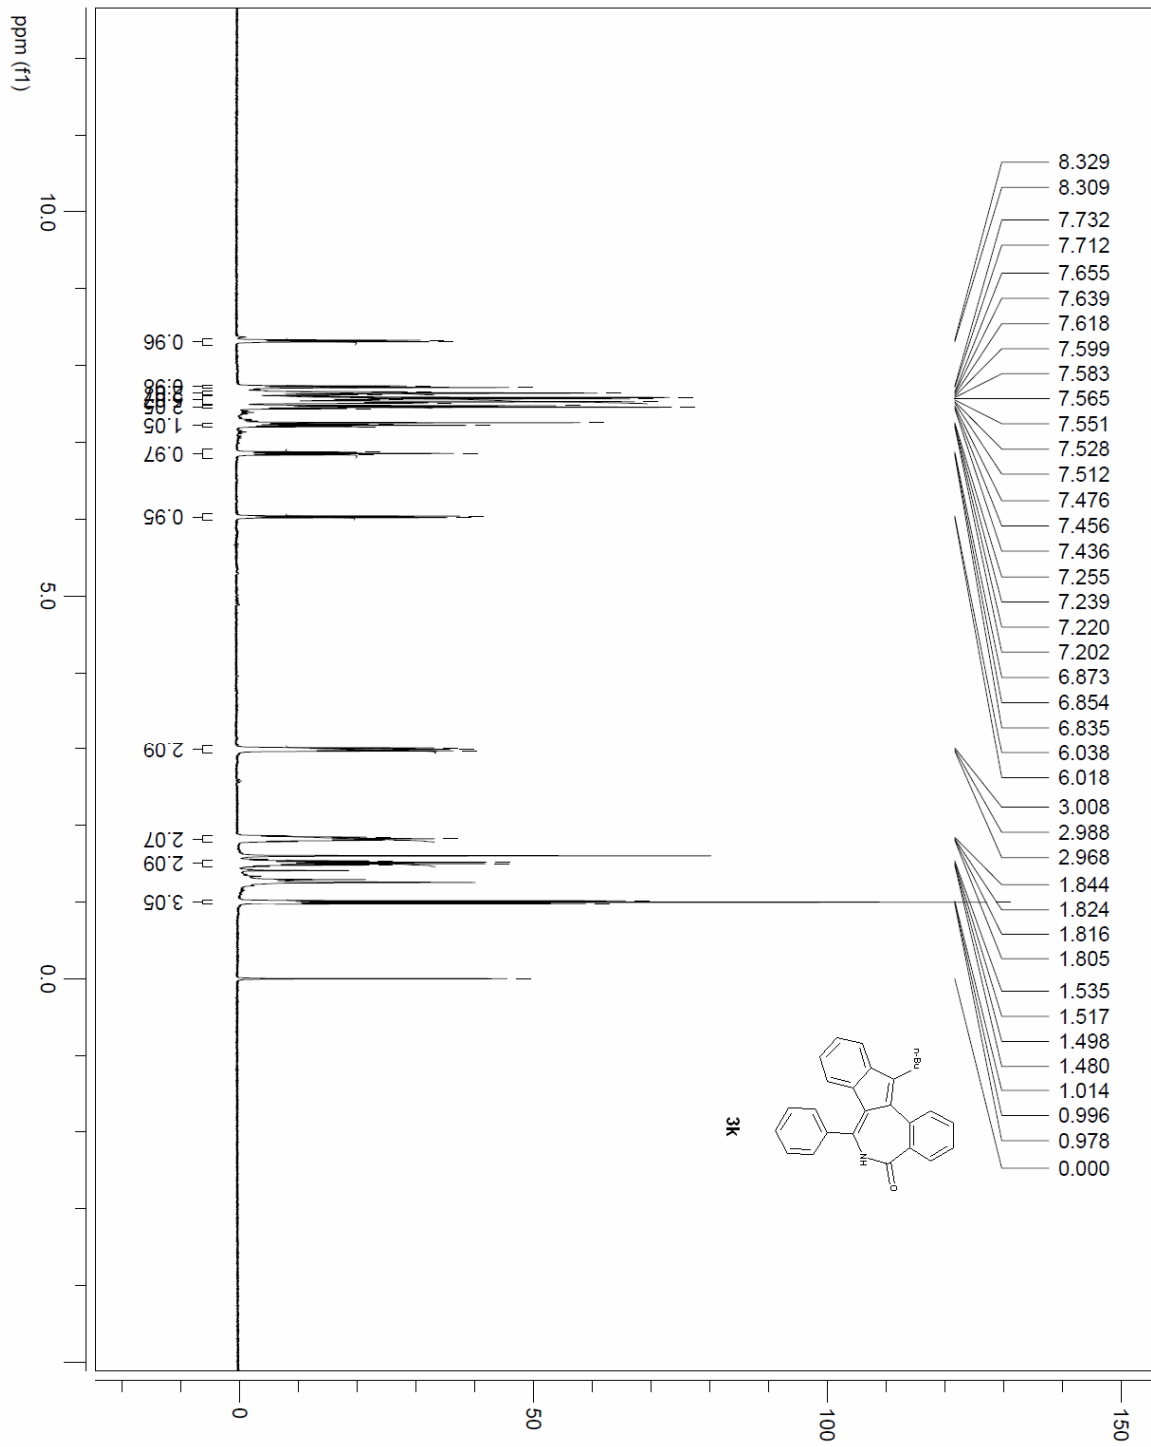

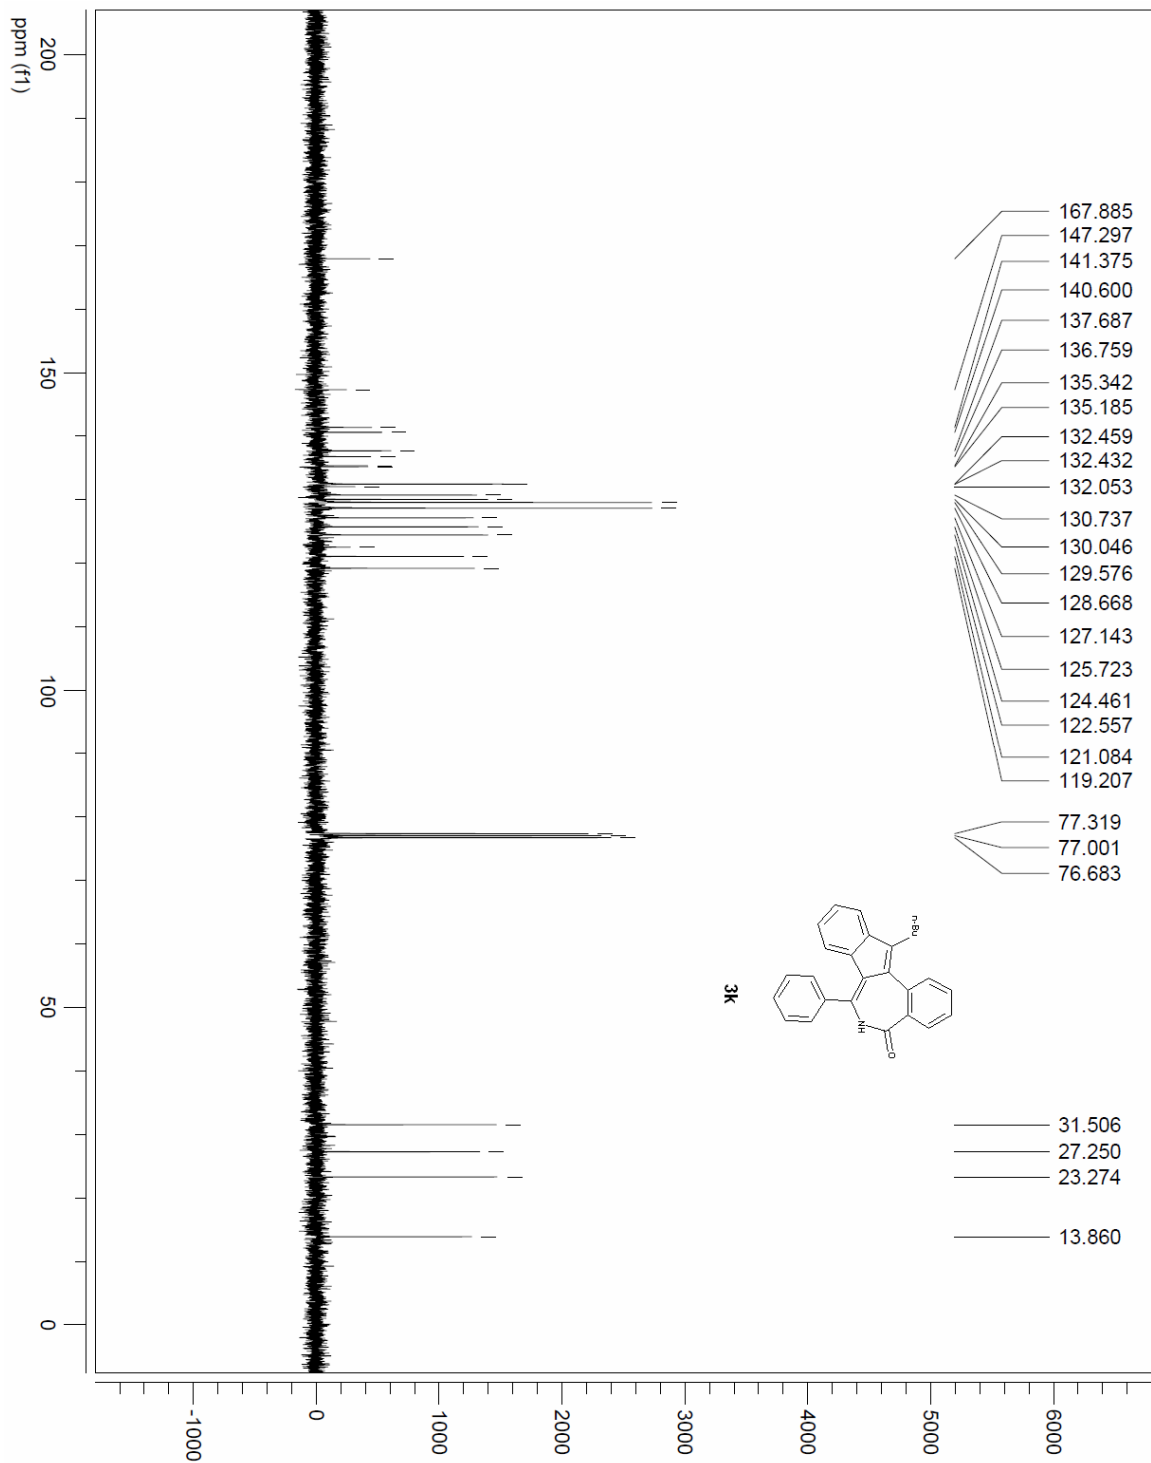



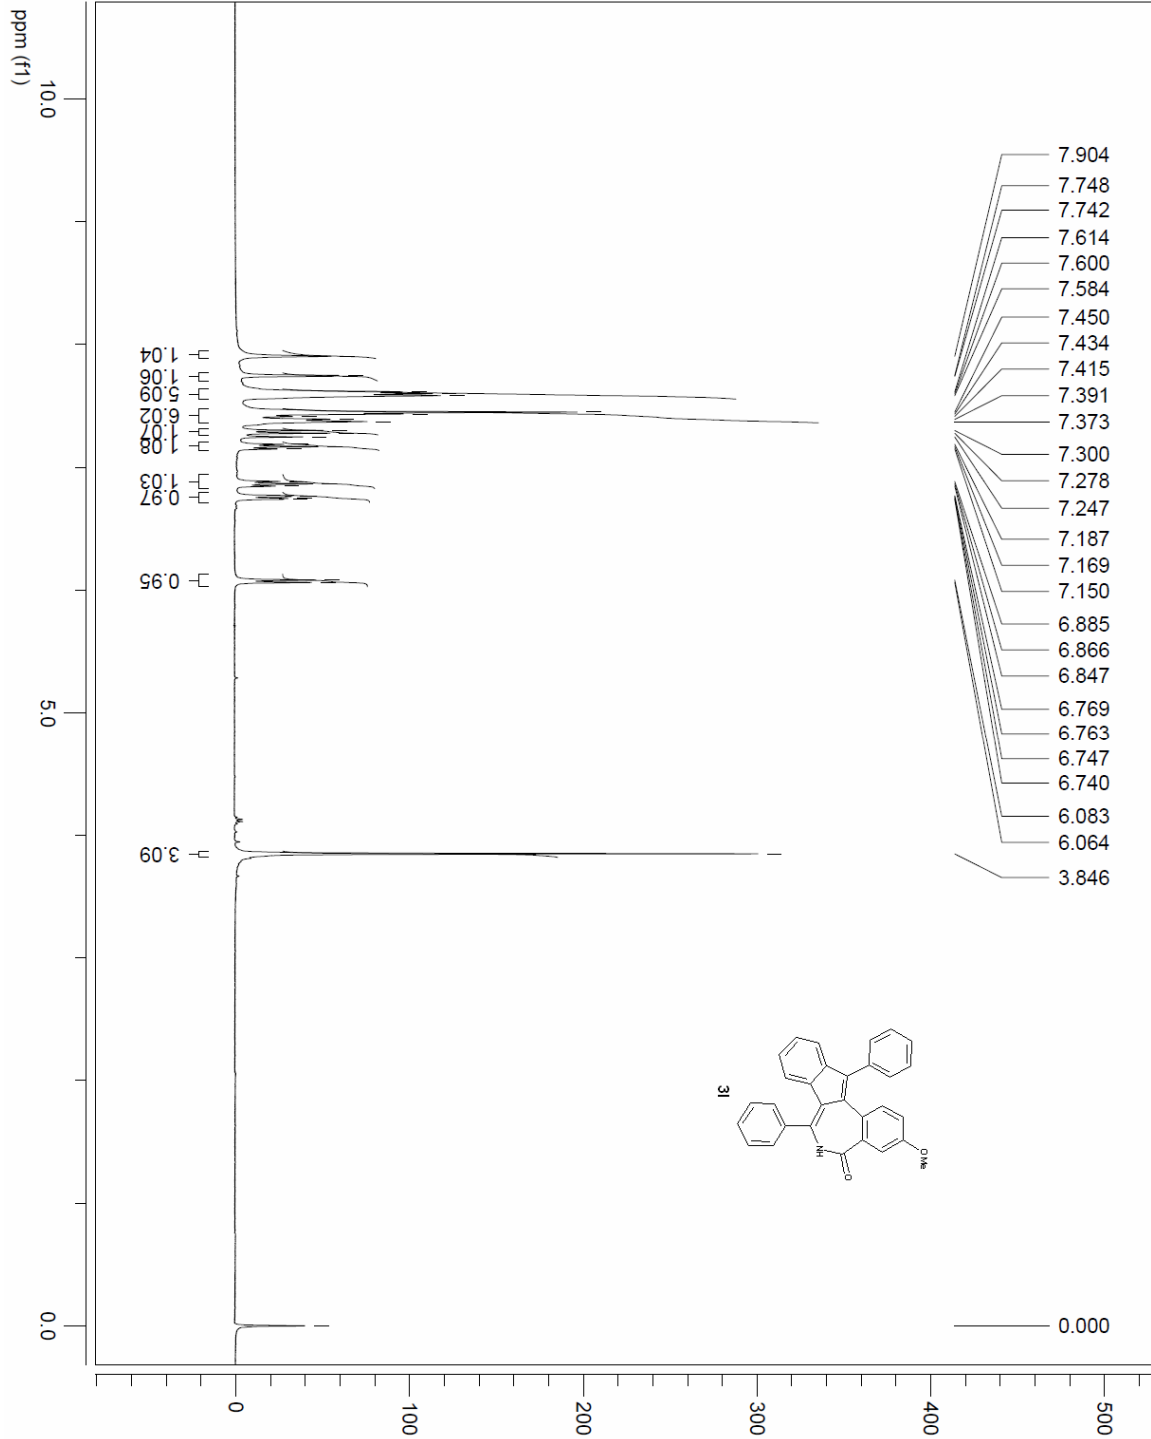

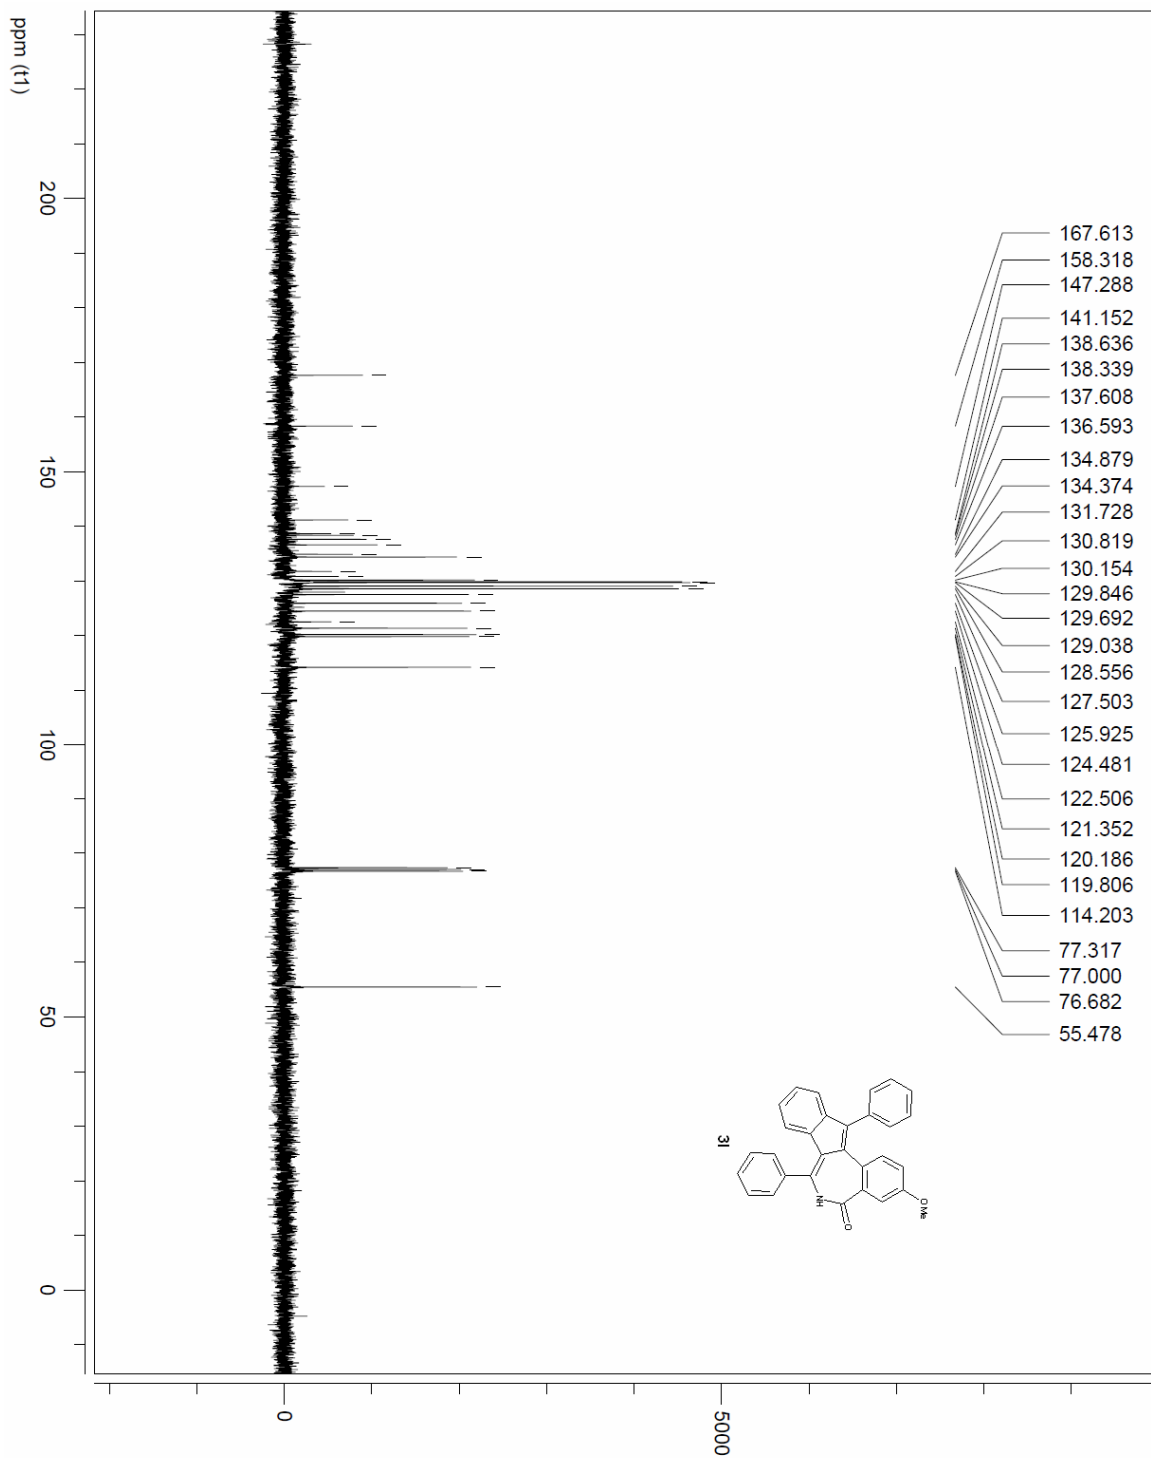



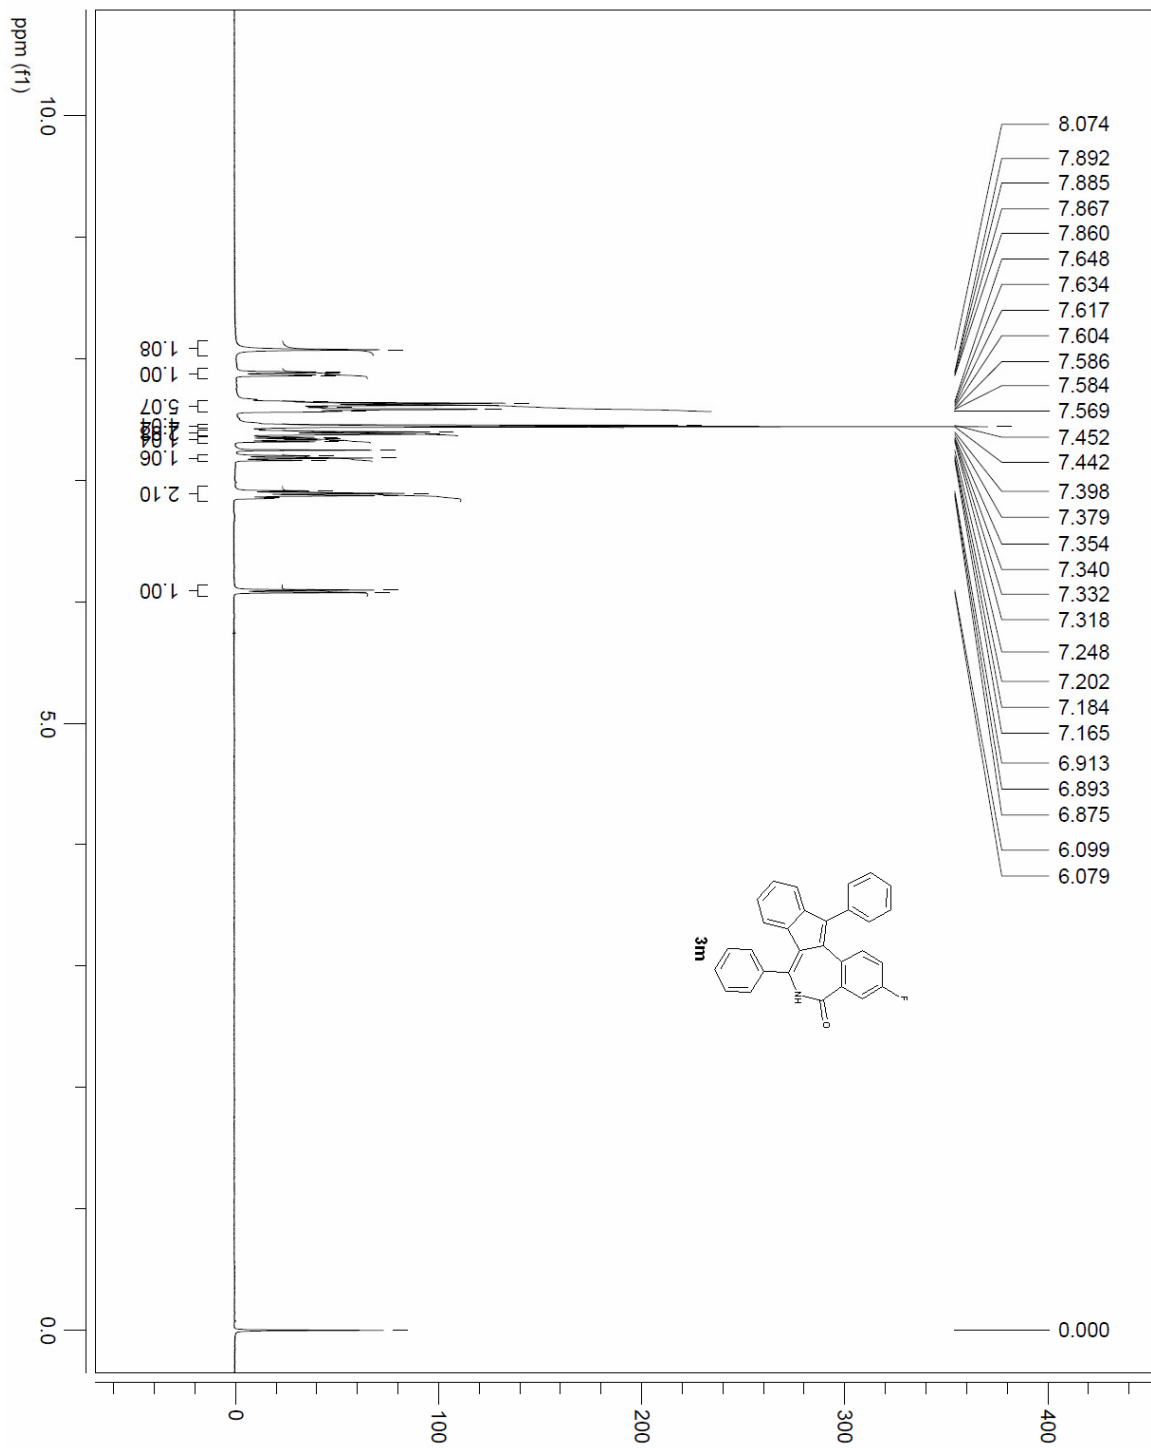



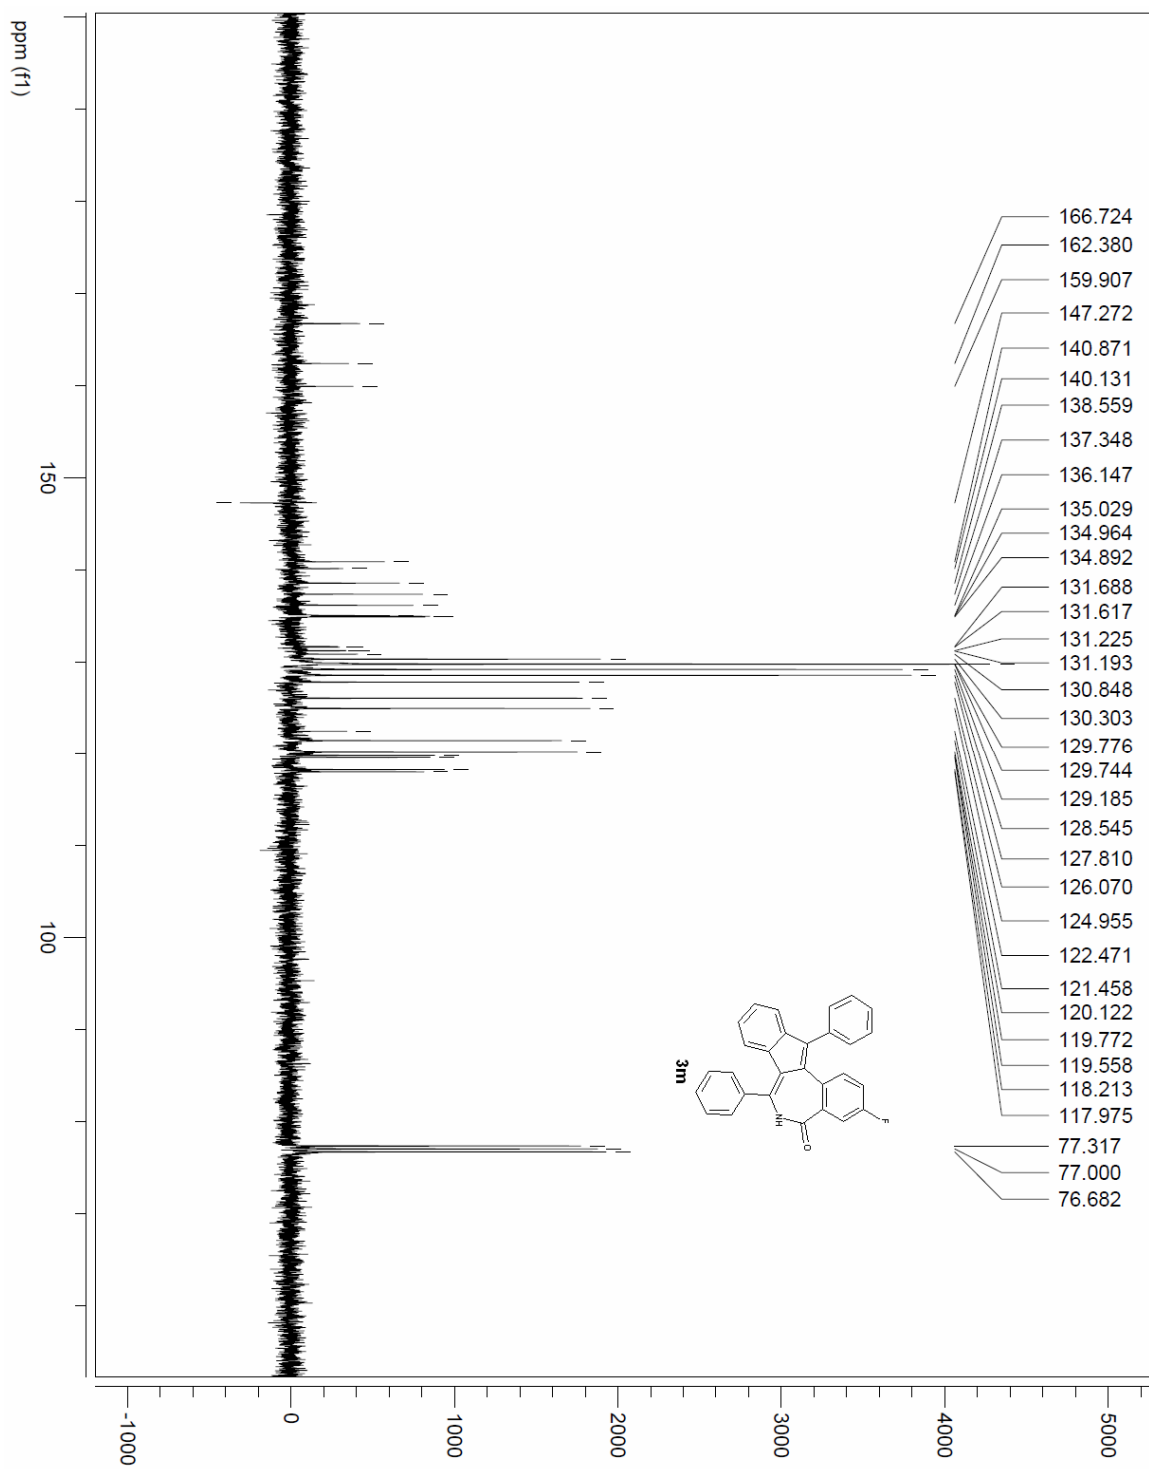

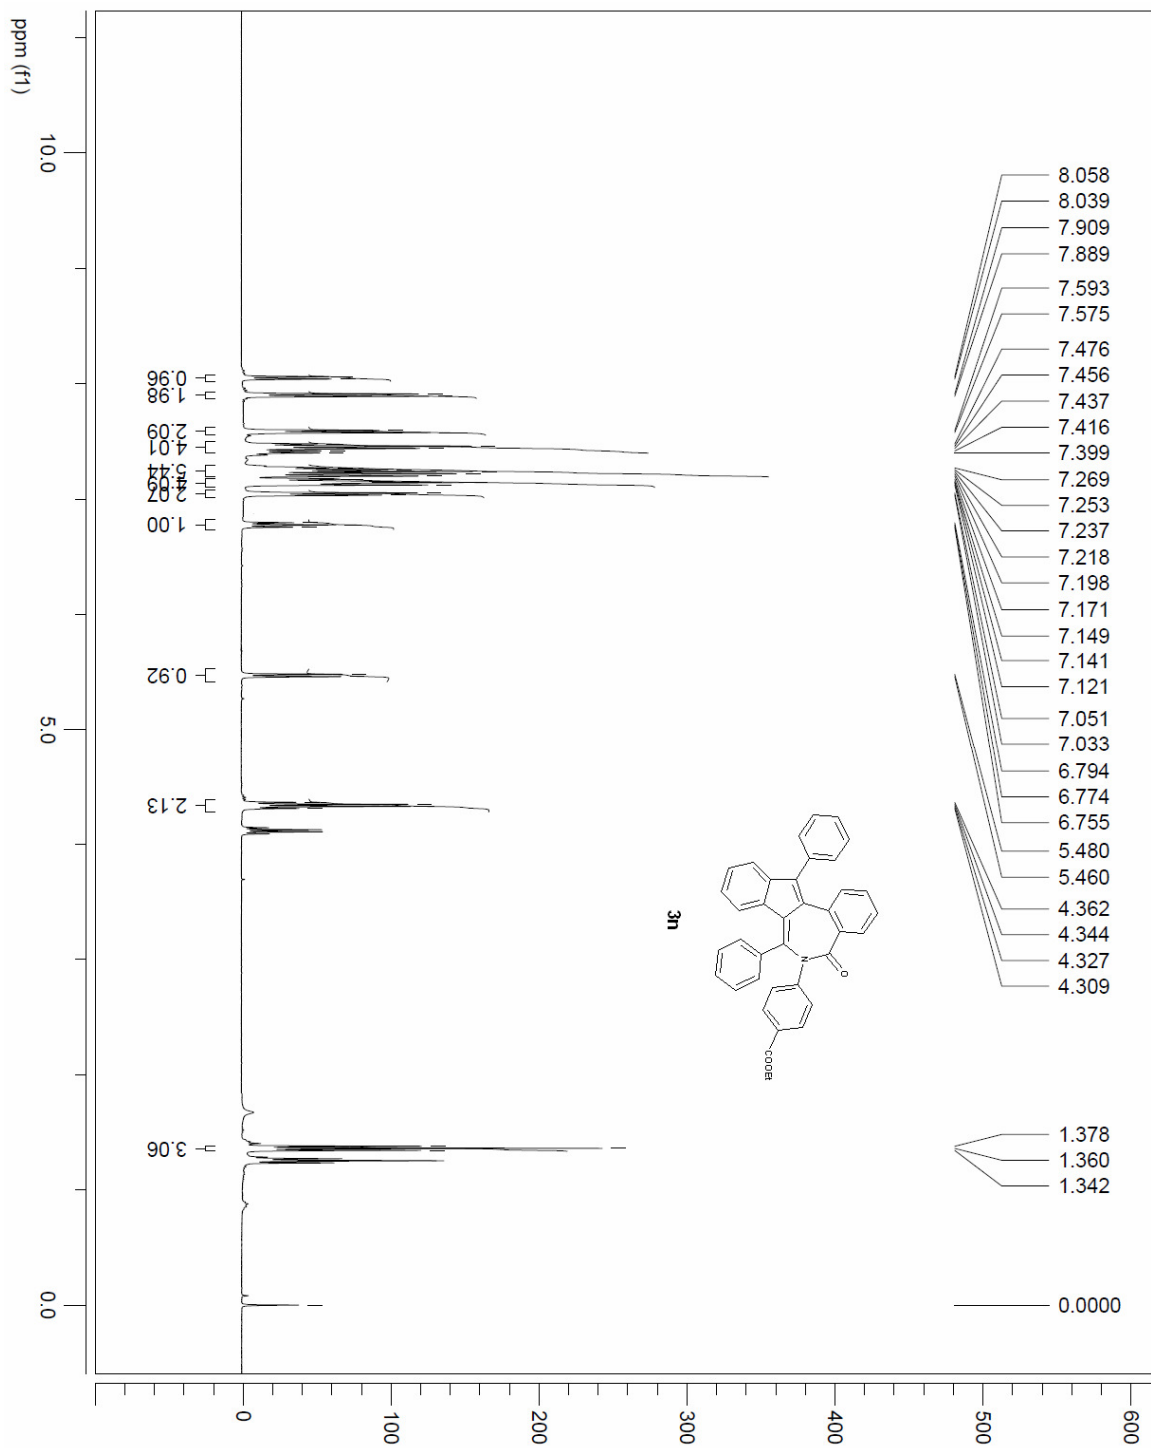

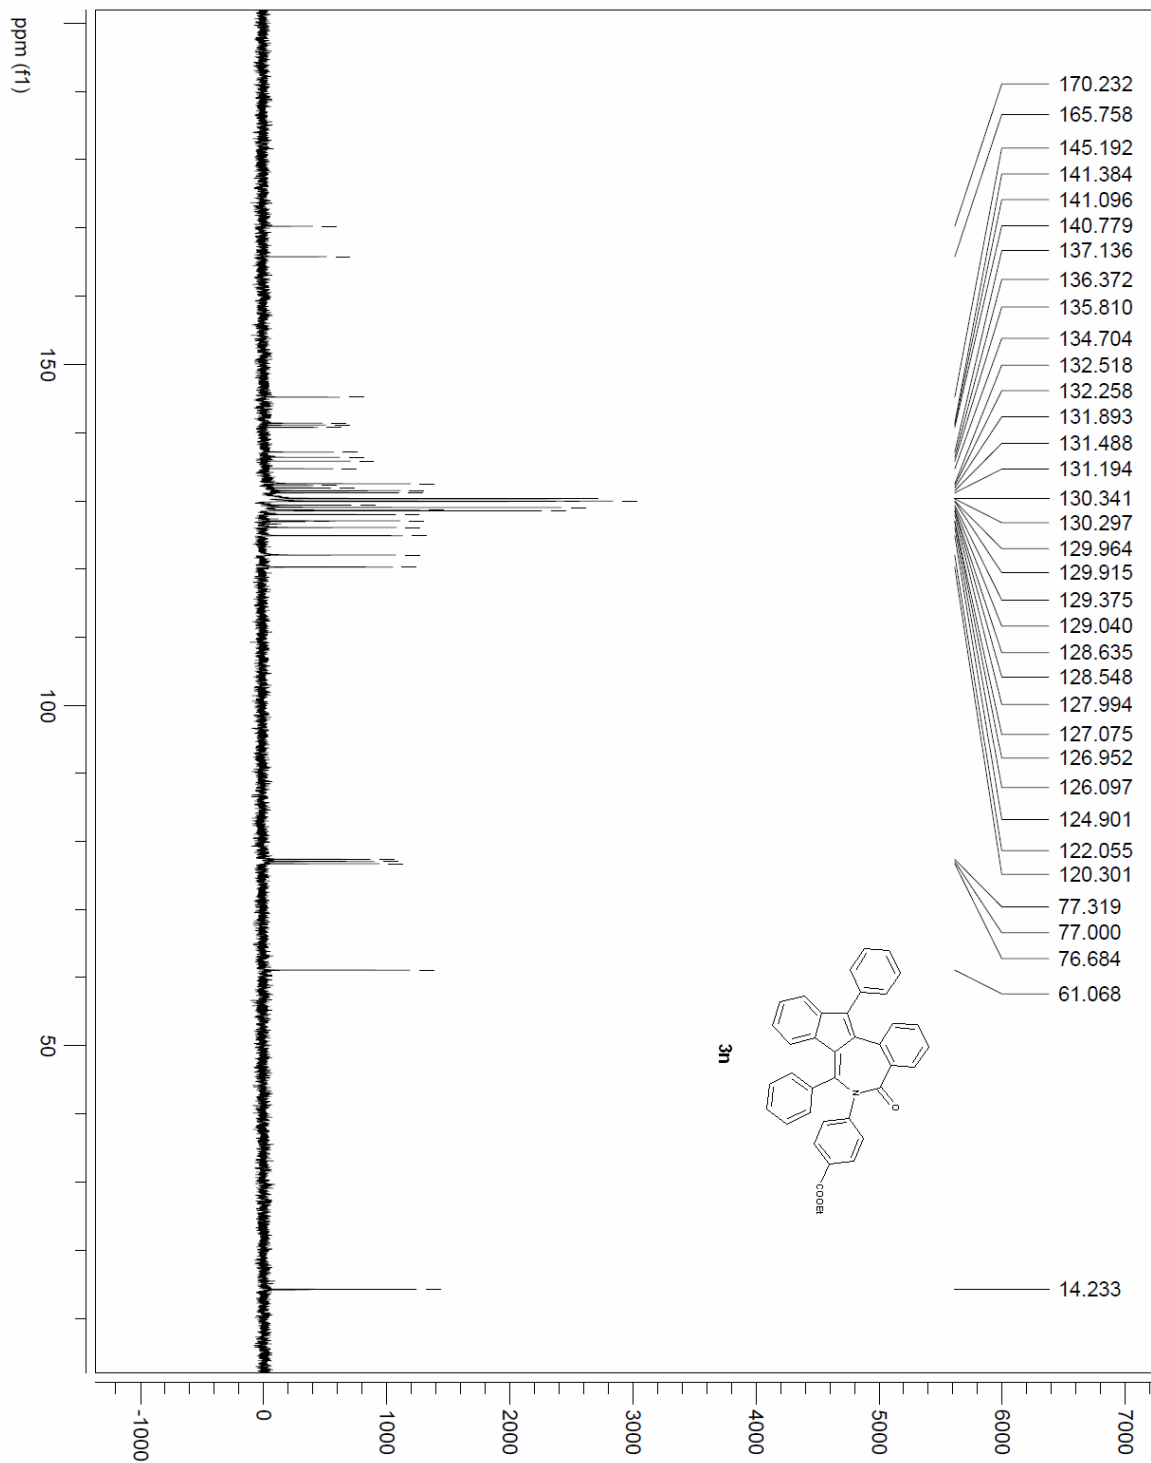



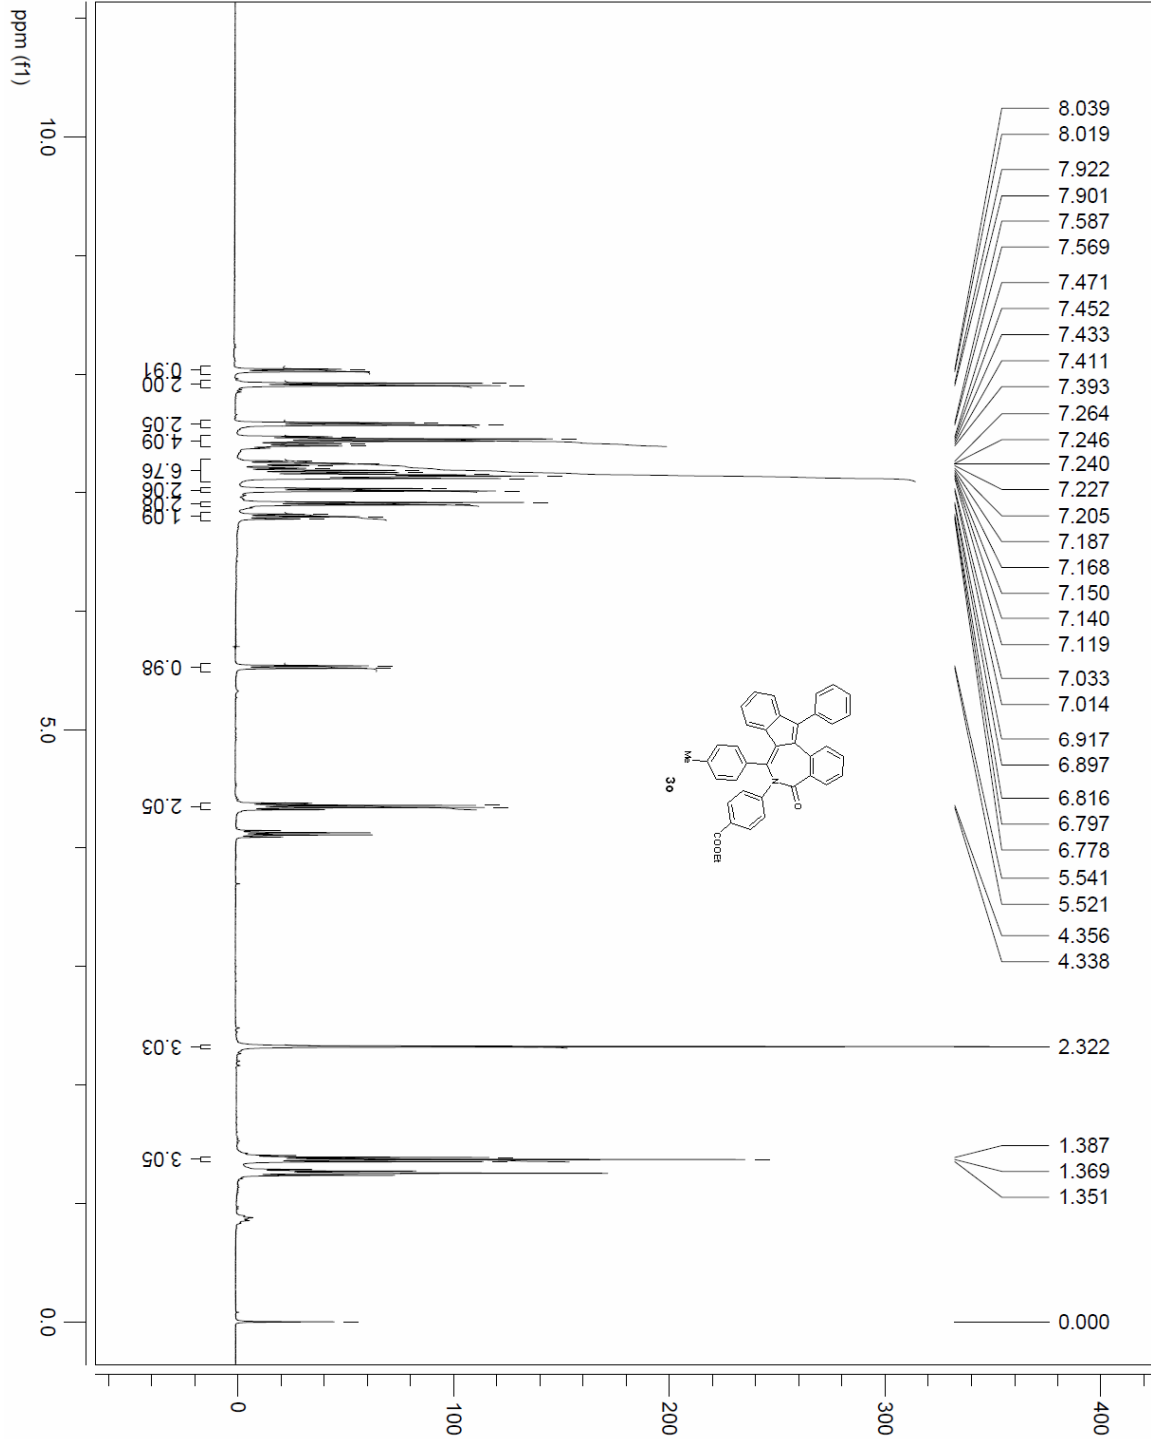

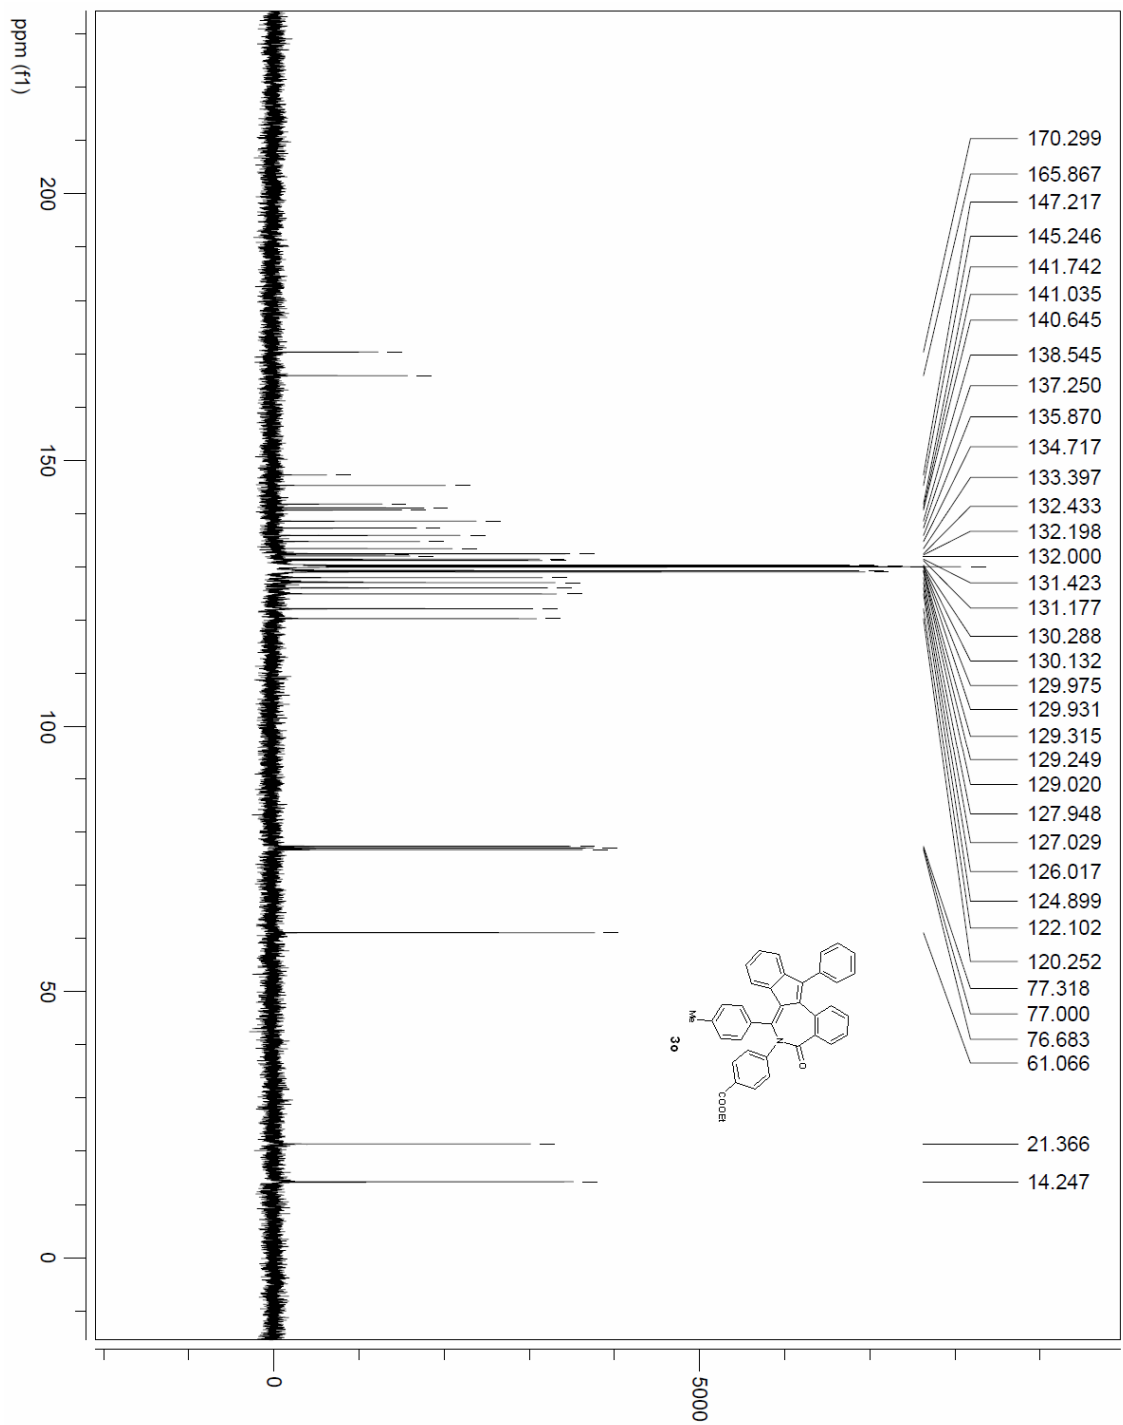



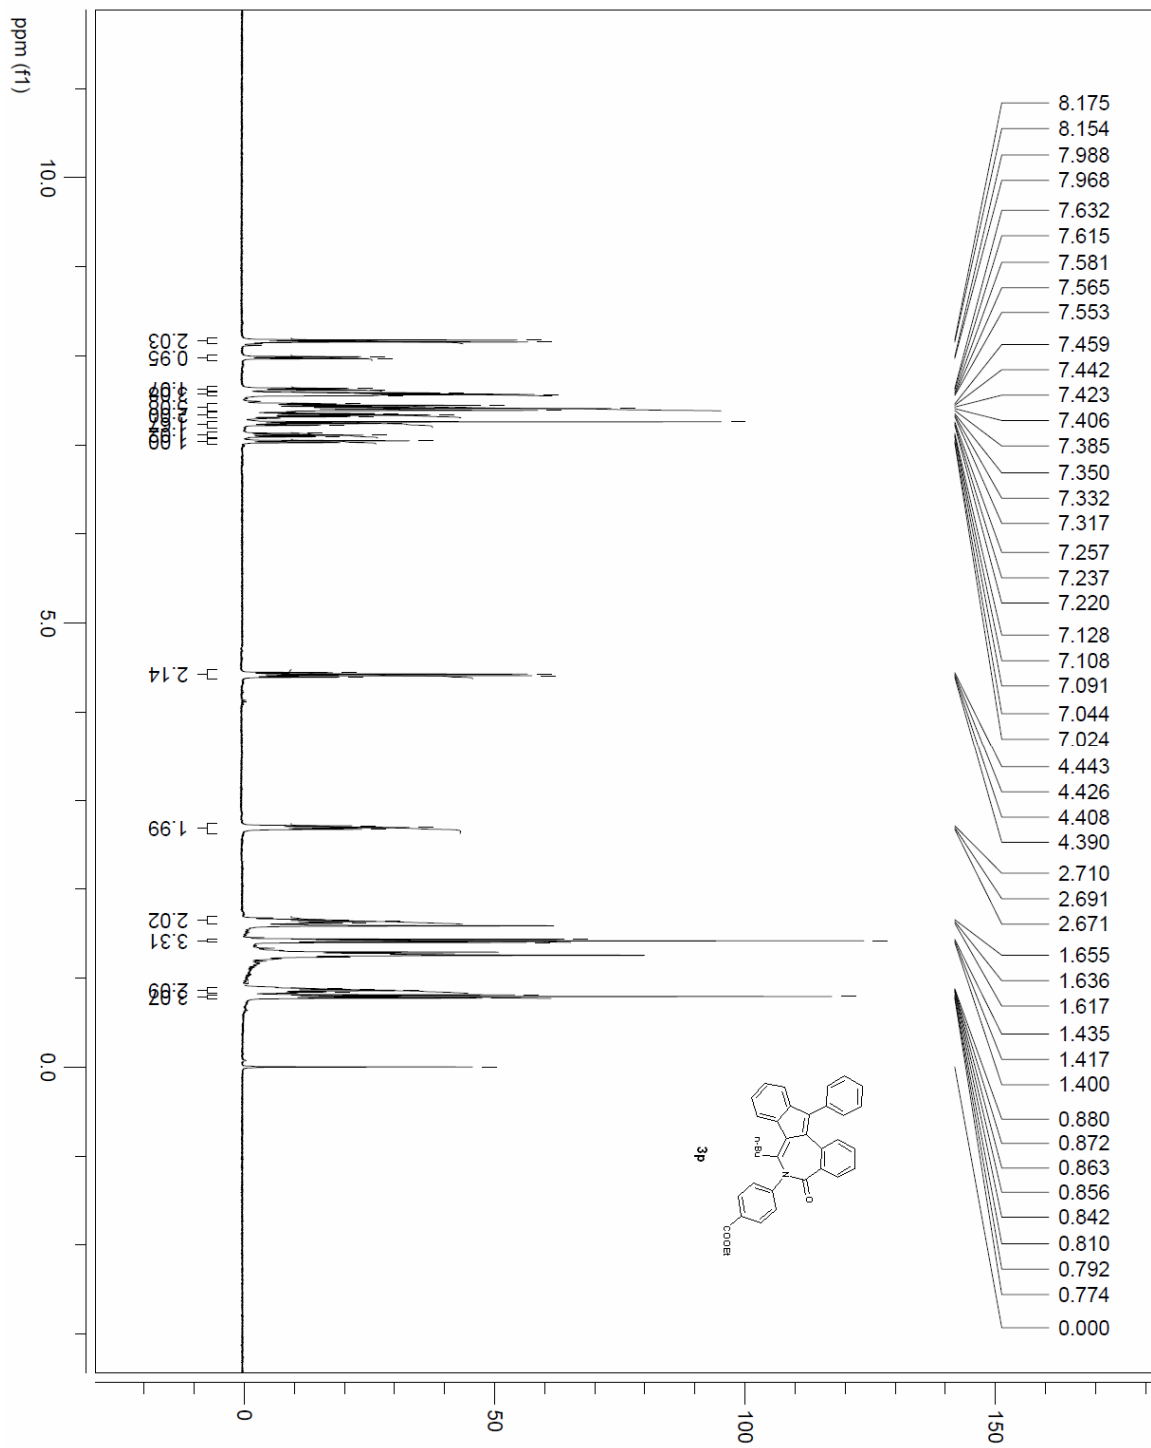



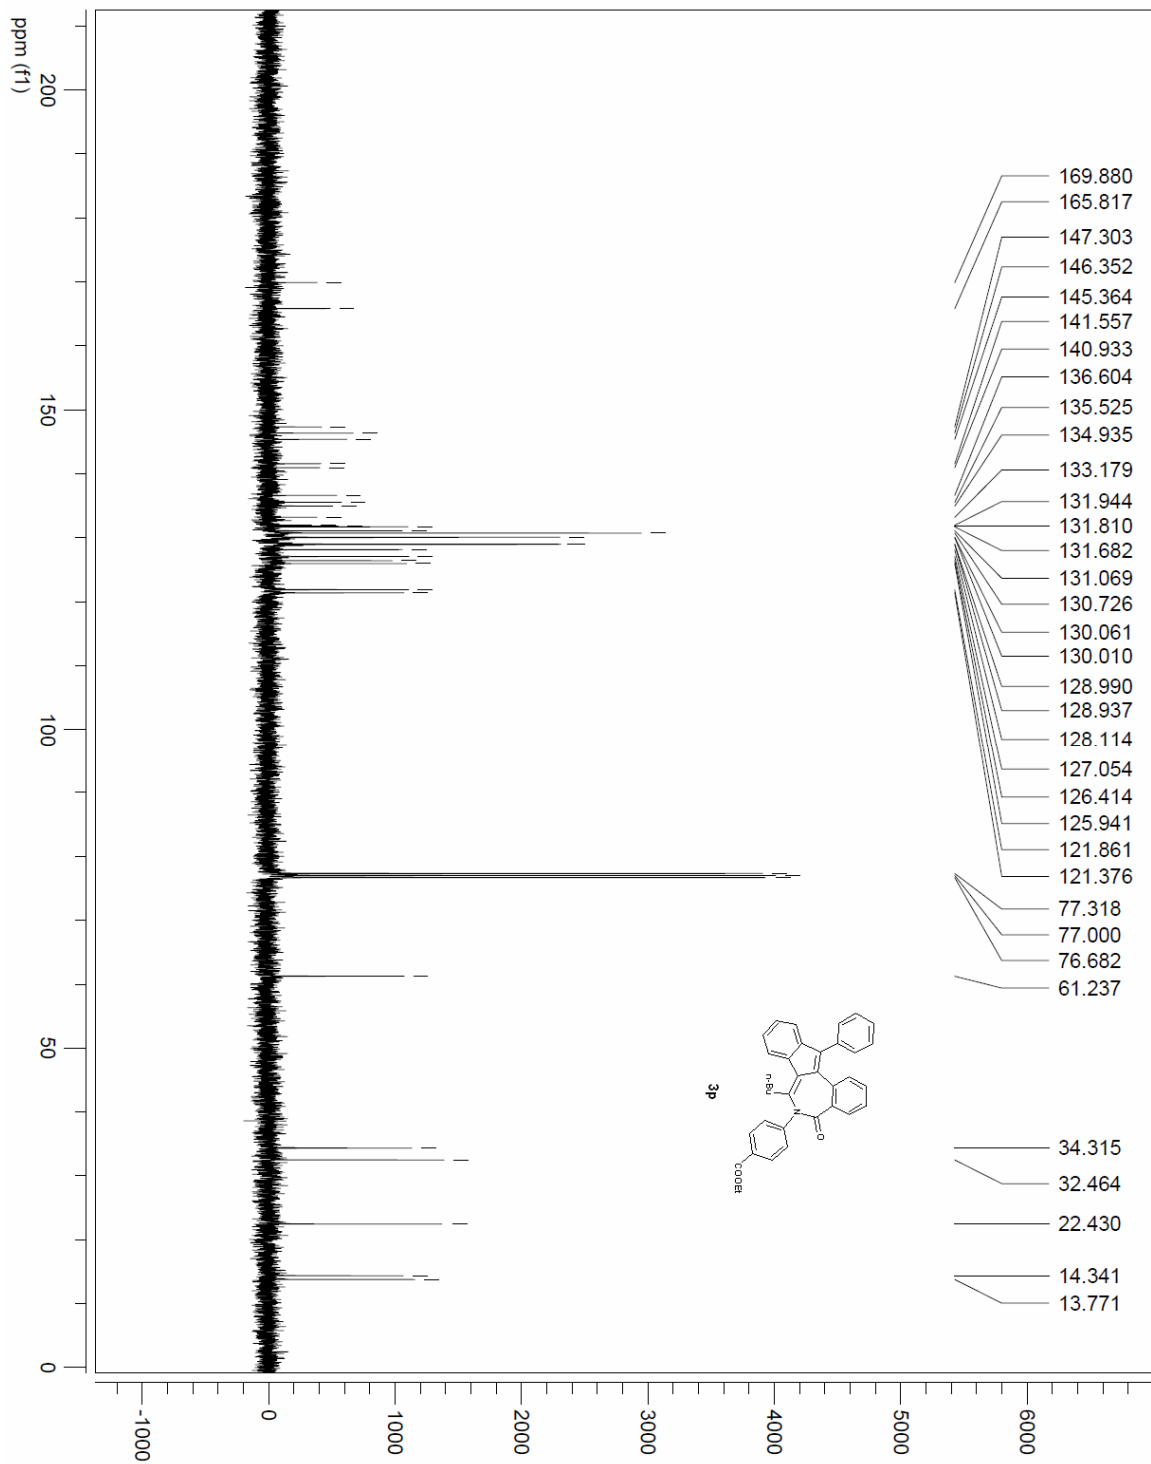

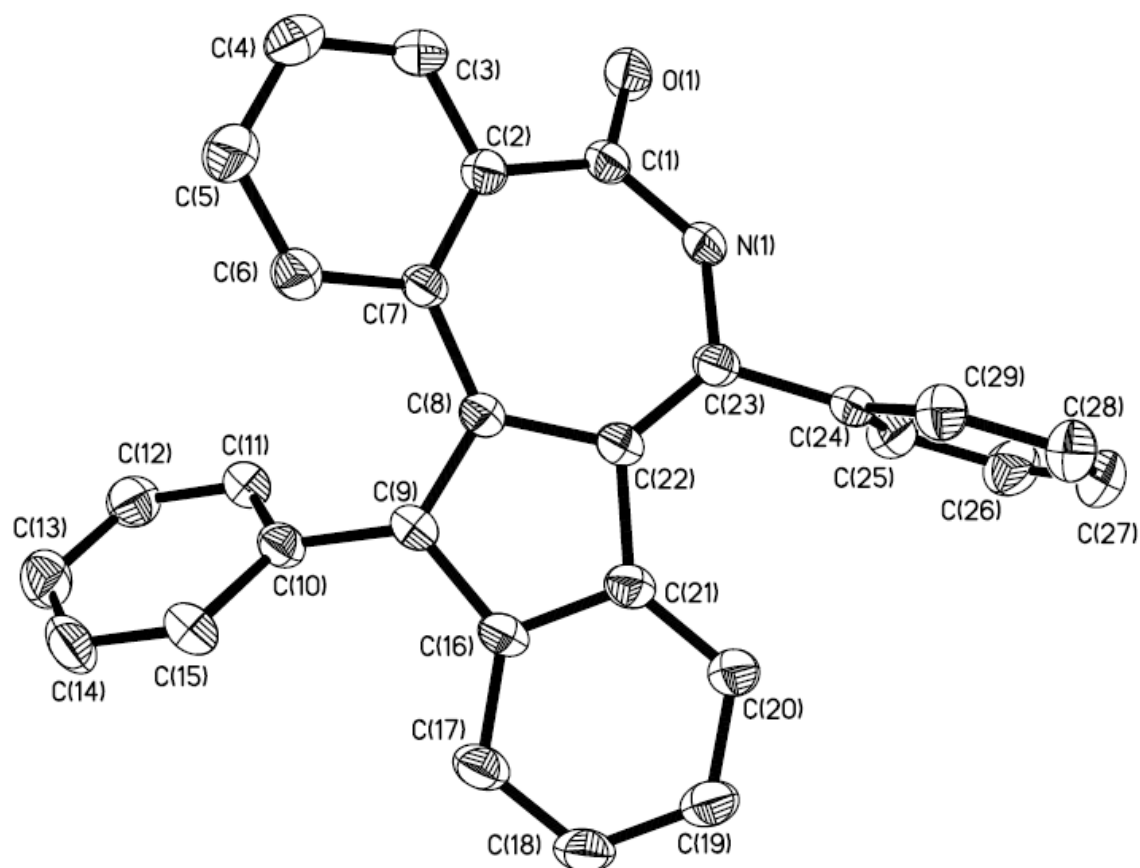

Supplement: c1cc14480d.pdf [file c1cc14480d.pdf]
